# Supplementary material for: Influence of principal stress effect on deformation and permeability of coal containing beddings under true triaxial stress conditions
Source: R Soc Open Sci. 2019 Feb 13;6(2):181438. doi: 10.1098/rsos.181438 (PMC6408416; doi:10.1098/rsos.181438)
Supplement: Data [file rsos181438supp1.xlsx]

## Sheet: Data
Time	F_X	Displacement_X	F1_Y	Displacement_Y	F1_Z	Displacement_Z
S	kN	mm	kN	mm	kN	mm
1	32.96	-3.66726	10.7578	-2.39899	38.5144	0.706427
2.2	33.0515	-3.66761	11.0324	-2.39962	39.3994	0.710089
3.5	33.372	-3.66657	11.124	-2.39867	40.8032	0.713141
4.7	34.0587	-3.6645	11.6275	-2.39867	42.6038	0.719245
5.9	35.2489	-3.65899	12.9551	-2.39739	45.1674	0.728095
7.1	37.4004	-3.64934	14.9236	-2.39899	48.2498	0.735115
8.3	39.8724	-3.63659	17.0751	-2.40122	51.912	0.746712
9.5	42.3444	-3.62557	20.0507	-2.40521	56.0625	0.759224
10.8	45.32	-3.60972	22.7973	-2.40633	60.0909	0.770211
12	49.1195	-3.59284	26.2307	-2.40912	64.272	0.781503
13.2	52.9191	-3.57423	29.4809	-2.40976	67.3849	0.787301
14.4	56.7644	-3.5539	32.7769	-2.40976	70.3757	0.793405
15.7	61.9831	-3.53323	36.8969	-2.40816	73.0308	0.799203
16.9	66.2862	-3.51531	40.2844	-2.40493	75.0145	0.80134
18.1	70.5435	-3.49946	44.3586	-2.39899	76.9982	0.803476
19.3	74.2058	-3.48568	48.1124	-2.39228	78.6157	0.803781
20.5	77.5933	-3.47603	51.8204	-2.38279	79.8669	0.804392
21.8	79.516	-3.46707	55.4826	-2.37385	80.7825	0.804392
23	82.7204	-3.45949	58.8244	-2.36531	82.2474	0.804697
24.2	85.5129	-3.4526	62.3035	-2.35574	83.8649	0.804392
25.4	88.0306	-3.44709	65.92	-2.34752	85.6044	0.804086
26.6	90.5484	-3.44054	69.5364	-2.33699	88.0154	0.806223
27.8	92.9746	-3.43572	72.6493	-2.32905	90.3043	0.808054
29.1	95.4467	-3.43193	75.7164	-2.3192	92.8068	0.811106
30.3	98.0102	-3.42676	78.8293	-2.31201	95.6145	0.814158
31.5	100.436	-3.42228	81.5302	-2.30459	98.3917	0.819956
32.7	102.13	-3.41918	84.0022	-2.29917	100.986	0.822703
33.9	101.672	-3.42366	85.8791	-2.29243	102.725	0.825449
35.2	99.3835	-3.43193	86.7489	-2.28584	103.244	0.82667
36.4	96.6369	-3.4433	88.2595	-2.27978	103.458	0.828501
37.6	93.2035	-3.45639	89.6329	-2.27284	103.58	0.828806
38.8	89.6786	-3.46811	90.5942	-2.26837	103.305	0.830638
40	87.8933	-3.47741	92.2422	-2.26486	103.519	0.832774
41.3	86.6573	-3.48361	94.0733	-2.2623	103.702	0.836436
42.5	86.3826	-3.48603	95.9502	-2.25943	103.702	0.837962
43.7	86.108	-3.4874	97.5982	-2.25688	103.855	0.839183
46	86.3826	-3.48982	100.665	-2.25285	103.641	0.840098
47.2	86.2911	-3.48913	102.222	-2.25201	103.031	0.841014
48.4	86.4742	-3.48913	103.32	-2.2493	102.603	0.842234
49.6	86.7489	-3.48913	104.556	-2.24994	102.237	0.840098
50.8	86.8862	-3.48775	105.472	-2.24834	101.688	0.841319
52	87.5271	-3.48637	105.93	-2.24738	101.138	0.840709
53.3	88.7173	-3.48292	106.342	-2.24834	100.894	0.840403
54.5	90.0906	-3.47741	106.937	-2.2477	100.558	0.840709
55.7	91.464	-3.47259	107.028	-2.24834	100.162	0.840098
56.9	93.1577	-3.46707	107.257	-2.24898	100.009	0.838267
58.1	94.2564	-3.46259	107.074	-2.24994	99.826	0.838267
59.4	95.7213	-3.45812	106.799	-2.24994	99.826	0.837352
60.6	96.3164	-3.45536	106.25	-2.25026	99.5819	0.835215
61.8	96.9115	-3.45295	105.243	-2.25054	99.2157	0.835215
63	96.82	-3.45157	104.511	-2.25026	99.1852	0.832774
64.2	96.7742	-3.45157	103.641	-2.25145	98.8189	0.832469
65.5	96.6369	-3.45054	102.908	-2.25057	98.6358	0.831858
66.7	96.5453	-3.45157	101.764	-2.24962	98.7884	0.831553
67.9	96.6369	-3.45157	101.077	-2.25026	99.0936	0.830332
69.1	96.4537	-3.45122	100.299	-2.24962	99.1546	0.829722
70.3	96.5911	-3.45088	99.3377	-2.25026	99.3988	0.830027
71.5	96.4995	-3.45157	98.1475	-2.25057	99.765	0.828196
72.8	96.3622	-3.45122	97.4151	-2.2493	100.07	0.828806
74	96.0875	-3.4526	96.408	-2.24898	100.528	0.828501
75.2	95.8586	-3.4526	95.8129	-2.25057	100.711	0.829112
76.4	94.9889	-3.45467	94.9431	-2.25117	101.169	0.828196
77.6	94.348	-3.45605	93.936	-2.25089	101.535	0.828806
78.9	93.4324	-3.45915	93.2035	-2.25117	102.176	0.828806
80.1	92.3337	-3.46156	92.4711	-2.25313	102.39	0.828806
81.3	91.0062	-3.46466	91.876	-2.25341	102.634	0.830638
82.5	90.1364	-3.46811	91.0977	-2.25433	102.786	0.829417
83.7	89.6329	-3.4688	90.5484	-2.2556	102.756	0.831553
85	88.8546	-3.46845	90.5026	-2.25784	102.847	0.833079
86.2	88.7173	-3.46983	89.7702	-2.25784	103.091	0.8343
87.4	88.4884	-3.46914	89.7702	-2.26071	103.244	0.833995
88.6	89.0835	-3.46811	89.6329	-2.26199	103.305	0.833384
89.8	89.2666	-3.46604	89.8618	-2.26326	103.519	0.832774
91	89.7702	-3.46328	89.6786	-2.26486	103.458	0.834605
92.3	90.0906	-3.46087	89.7702	-2.26773	103.61	0.833995
93.5	90.2738	-3.45846	89.4955	-2.26996	103.58	0.834605
94.7	90.5026	-3.4557	89.7702	-2.27028	103.58	0.833079
95.9	90.8231	-3.45329	89.9991	-2.27156	103.519	0.8343
97.1	91.1893	-3.45122	89.9533	-2.27367	103.488	0.8343
98.4	91.3724	-3.4495	90.2738	-2.27451	103.275	0.833384
99.6	91.6929	-3.44674	90.5026	-2.27595	103.153	0.833995
100.8	91.9675	-3.44399	90.4111	-2.27691	103.031	0.833995
102	92.5169	-3.44227	90.6857	-2.27691	102.756	0.833689
103.5	93.2951	-3.43848	91.5097	-2.2785	102.786	0.833079
104.7	93.2035	-3.43572	91.5555	-2.27946	102.359	0.833995
105.9	94.3022	-3.43193	92.0591	-2.27978	102.481	0.831248
107.2	95.2178	-3.4278	93.2493	-2.27882	102.451	0.829417
108.5	95.996	-3.42401	95.0804	-2.27659	102.42	0.828501
109.7	96.9573	-3.42159	97.0946	-2.27367	102.267	0.825144
110.9	97.7355	-3.41918	99.3835	-2.26996	102.329	0.821787
112.1	97.5982	-3.41849	101.627	-2.2655	102.207	0.819651
113.3	97.8728	-3.41711	103.961	-2.25879	101.932	0.816599
114.5	97.0489	-3.41987	106.388	-2.25317	101.657	0.813547
125.7	90.5484	-3.45501	130.375	-2.17701	100.833	0.783029
126.9	89.9075	-3.45949	133.305	-2.16887	100.955	0.781808
128.1	89.2209	-3.46397	135.823	-2.1591	100.955	0.779366
129.3	88.7173	-3.46776	138.661	-2.15044	101.077	0.776009
130.6	88.2138	-3.47362	141.499	-2.14126	101.321	0.775094
131.8	87.344	-3.47707	143.834	-2.13328	101.413	0.772347
133	87.0235	-3.48189	146.763	-2.12466	101.474	0.770516
134.2	86.6573	-3.48534	149.51	-2.1174	101.382	0.770211
135.4	86.6115	-3.48947	152.074	-2.10975	101.718	0.768685
136.7	86.1538	-3.49223	154.637	-2.10312	101.871	0.766854
137.9	85.9706	-3.49602	157.384	-2.09578	101.871	0.765328
139.1	85.8333	-3.49912	160.039	-2.08876	101.779	0.764107
140.3	85.8333	-3.49981	162.511	-2.08242	101.962	0.763497
141.5	85.7875	-3.50222	164.983	-2.07799	102.176	0.76136
142.8	85.696	-3.50497	167.547	-2.07033	102.329	0.76014
144	85.6502	-3.50739	170.11	-2.0645	102.176	0.758919
145.2	85.7417	-3.51118	172.491	-2.05828	102.237	0.757698
146.4	85.5129	-3.51152	174.688	-2.05285	102.39	0.758004
147.6	85.5586	-3.51462	177.206	-2.04719	102.42	0.754952
148.8	85.5586	-3.51566	179.357	-2.0424	102.359	0.754952
150.1	85.4671	-3.51841	181.875	-2.03666	102.786	0.75312
151.3	85.5129	-3.52117	184.027	-2.03059	102.817	0.752205
152.5	85.2382	-3.52289	186.544	-2.02521	102.939	0.752205
153.7	84.9635	-3.52461	188.833	-2.02078	103.153	0.750984
154.9	85.0093	-3.52703	191.076	-2.01439	103.214	0.750069
156.2	85.0551	-3.52944	193.045	-2.00929	103.183	0.748848
157.4	84.9635	-3.53013	195.334	-2.00534	103.244	0.747322
158.6	84.7346	-3.53323	197.211	-2.00043	103.458	0.747322
159.8	84.6889	-3.5353	199.454	-1.99437	103.458	0.745491
161	84.5058	-3.53771	201.514	-1.99086	103.244	0.74366
162.3	84.46	-3.53909	203.574	-1.98575	103.122	0.742744
163.5	84.2311	-3.5415	205.405	-1.98104	103.122	0.742744
164.7	83.9106	-3.54322	207.373	-1.97753	103.031	0.740913
165.9	83.8649	-3.54494	209.296	-1.97243	102.542	0.739387
167.1	83.636	-3.54632	211.036	-1.96756	102.634	0.737861
168.3	83.4986	-3.54839	212.867	-1.96389	102.573	0.736641
169.6	83.3155	-3.55046	214.744	-1.95878	102.512	0.735115
170.8	83.3155	-3.55218	216.62	-1.95591	102.664	0.73481
172	83.3155	-3.55459	218.268	-1.95052	102.847	0.733589
173.2	83.0409	-3.55666	220.237	-1.94641	103.031	0.733589
174.4	82.9493	-3.55804	221.931	-1.94226	102.939	0.731757
175.7	83.1324	-3.55976	223.945	-1.93811	103.091	0.730842
176.9	82.9035	-3.5601	225.913	-1.93396	103.397	0.729621
178.1	82.8577	-3.56217	228.294	-1.93033	103.641	0.726569
179.3	82.812	-3.56355	230.766	-1.92479	103.61	0.726874
180.5	83.0409	-3.56527	233.1	-1.91968	104.007	0.724128
181.8	82.9951	-3.5663	235.893	-1.91366	103.885	0.723823
183	83.0409	-3.56768	238.182	-1.90859	104.129	0.721687
184.2	82.9951	-3.56768	240.562	-1.9038	104.221	0.719245
185.4	83.224	-3.56837	243.217	-1.89902	104.16	0.715888
186.6	82.9035	-3.57044	245.781	-1.89339	104.129	0.714362
187.8	83.224	-3.57216	248.07	-1.88793	104.221	0.71131
189.1	83.224	-3.57251	250.221	-1.88282	104.007	0.7107
190.3	83.0409	-3.57389	252.51	-1.87835	103.946	0.708563
191.5	83.4529	-3.57423	254.799	-1.87408	103.855	0.705512
192.7	83.4529	-3.57458	257.088	-1.86981	103.641	0.703681
193.9	83.8649	-3.57699	259.514	-1.86343	103.671	0.701239
195.2	83.8649	-3.57664	261.849	-1.859	103.61	0.698187
196.4	84.0022	-3.57733	264.092	-1.85358	103.671	0.696967
197.6	84.0938	-3.57699	266.335	-1.84819	103.58	0.69483
198.8	84.3684	-3.57802	268.716	-1.84468	103.732	0.692999
200	84.5973	-3.57871	270.913	-1.84053	103.824	0.691168
201.3	85.0093	-3.57871	273.339	-1.83574	103.946	0.688116
202.5	85.1009	-3.5794	275.811	-1.83008	104.099	0.686895
203.7	85.3298	-3.57837	278.42	-1.82529	104.16	0.685674
204.9	85.696	-3.57905	280.618	-1.82146	104.251	0.682012
206.1	86.108	-3.57974	282.815	-1.81639	104.373	0.679876
207.3	86.1538	-3.58078	285.424	-1.81101	104.709	0.67774
208.6	86.4284	-3.58078	287.667	-1.80686	104.587	0.674993
209.8	86.5658	-3.58216	290.094	-1.80048	104.526	0.674078
211	86.7489	-3.58112	292.474	-1.79673	104.556	0.670721
212.2	86.7489	-3.58284	295.221	-1.79162	104.587	0.666753
213.4	87.0235	-3.58388	297.555	-1.78587	104.526	0.666143
214.7	87.2066	-3.58422	299.661	-1.77949	104.495	0.662175
215.9	87.344	-3.58595	302.179	-1.7757	104.556	0.659429
217.1	87.2066	-3.58732	304.605	-1.77032	104.618	0.659123
218.3	87.344	-3.58767	306.986	-1.76521	104.801	0.655767
219.5	87.2524	-3.59008	309.229	-1.7595	104.495	0.652409
220.8	87.3898	-3.59111	311.472	-1.75599	104.495	0.649968
222	87.2524	-3.59146	313.761	-1.74965	104.465	0.649052
223.2	87.4813	-3.59422	316.416	-1.74486	104.526	0.64539
224.4	87.6644	-3.59559	318.567	-1.7388	104.312	0.642338
225.6	87.8018	-3.59594	320.856	-1.73473	104.343	0.639592
226.8	87.5271	-3.59766	322.962	-1.7293	104.19	0.636845
228.1	87.7102	-3.59835	325.755	-1.72292	104.038	0.634404
229.3	87.8018	-3.60111	328.181	-1.71789	104.129	0.631962
230.5	88.0306	-3.6018	330.332	-1.71247	103.977	0.629215
231.7	87.9391	-3.60352	333.033	-1.7064	103.977	0.627079
232.9	88.2595	-3.6049	335.597	-1.70158	103.915	0.624027
234.2	88.3053	-3.60627	337.932	-1.69531	103.915	0.621281
235.4	88.4426	-3.60765	340.358	-1.68989	103.946	0.618839
236.6	88.58	-3.60972	342.738	-1.68366	103.977	0.617008
237.8	88.7631	-3.61179	345.348	-1.67784	103.671	0.61304
239	88.6715	-3.61316	347.774	-1.67273	103.641	0.610904
240.3	88.9462	-3.61523	350.108	-1.66635	103.732	0.609073
241.5	88.9462	-3.61627	352.443	-1.6626	103.763	0.608158
242.7	89.2666	-3.61833	354.366	-1.65717	103.763	0.604801
243.9	89.1293	-3.61937	356.38	-1.65175	103.793	0.602664
245.1	89.1751	-3.62178	358.257	-1.64732	103.732	0.600528
246.3	89.2209	-3.62247	360.225	-1.64353	103.61	0.599918
247.6	89.2209	-3.62316	362.194	-1.63842	103.61	0.596561
248.8	89.3582	-3.62488	364.437	-1.63331	103.58	0.595035
250	89.0835	-3.62695	366.268	-1.62797	103.549	0.591678
251.2	89.4497	-3.62832	368.419	-1.62478	103.58	0.589541
252.4	89.1293	-3.63005	370.708	-1.61839	103.58	0.588015
253.7	89.2209	-3.63246	373.867	-1.61201	103.793	0.585269
254.9	89.6329	-3.63453	376.934	-1.60571	103.824	0.583132
256.1	89.4955	-3.63625	379.589	-1.59932	103.855	0.57947
257.3	89.4955	-3.63832	382.244	-1.59294	103.763	0.578249
258.5	89.816	-3.6397	385.22	-1.58568	104.007	0.575503
259.8	89.7244	-3.64245	387.966	-1.58185	103.946	0.573672
261	90.0448	-3.64486	390.301	-1.57547	103.885	0.57123
262.2	89.9533	-3.64659	392.728	-1.5694	103.824	0.569094
263.4	90.1822	-3.64934	394.055	-1.56501	103.732	0.567263
264.6	89.9991	-3.65141	396.664	-1.55927	103.793	0.565737
265.8	89.9075	-3.65244	399.365	-1.55448	103.519	0.563295
267.1	90.0906	-3.65486	401.608	-1.54866	103.549	0.56238
268.3	90.1822	-3.65761	403.806	-1.54403	103.336	0.559328
269.5	90.0906	-3.66002	406.232	-1.5386	103.427	0.556276
270.7	90.228	-3.66244	408.155	-1.53318	103.275	0.555666
271.9	89.9075	-3.66382	410.031	-1.52847	103.091	0.55414
273.2	90.0449	-3.66692	412.183	-1.52336	103.031	0.551088
274.4	89.6786	-3.66829	414.334	-1.51826	103.061	0.548647
275.6	89.9075	-3.67071	416.44	-1.51319	102.939	0.547731
276.8	89.9991	-3.67381	418.409	-1.50812	102.969	0.545595
278	89.8618	-3.67518	420.789	-1.50365	103.031	0.542543
279.3	90.0449	-3.67622	423.307	-1.49791	102.847	0.539796
280.5	89.9533	-3.67897	425.733	-1.49157	102.817	0.537965
281.7	89.9991	-3.6807	427.931	-1.48746	102.664	0.535524
282.9	89.9075	-3.68276	430.357	-1.48171	102.756	0.533082
284.1	90.0906	-3.68483	432.508	-1.47661	102.603	0.530335
285.3	89.8618	-3.6869	434.477	-1.47222	102.817	0.526673
286.6	89.7244	-3.68897	436.491	-1.46679	102.512	0.525452
287.8	89.6329	-3.69103	438.093	-1.46264	102.603	0.523316
289	89.4955	-3.69379	439.833	-1.45849	102.512	0.522401
290.2	89.0378	-3.69586	441.252	-1.45379	102.451	0.520569
291.4	88.7631	-3.69862	442.946	-1.44964	102.267	0.518128
292.7	88.8546	-3.70068	444.273	-1.44549	102.39	0.516297
293.9	88.5342	-3.70378	445.418	-1.44198	102.267	0.516297
295.1	88.1222	-3.70551	446.562	-1.4391	102.207	0.515687
296.3	88.0306	-3.7093	447.478	-1.43559	102.267	0.513855
297.6	87.6186	-3.71136	448.622	-1.43344	102.115	0.514466
298.8	87.6186	-3.71309	449.4	-1.43121	102.115	0.511719
300	87.2982	-3.71584	450.316	-1.42674	101.932	0.511414
301.2	86.8862	-3.71894	451.094	-1.42482	102.145	0.512635
302.4	86.8862	-3.7217	451.781	-1.42227	102.054	0.51294
303.7	86.6573	-3.72273	452.376	-1.42003	101.779	0.512024
304.9	86.7946	-3.72377	453.246	-1.4188	101.993	0.512024
306.1	86.6115	-3.72583	453.749	-1.41596	101.962	0.511109
307.4	86.7489	-3.72825	453.932	-1.41437	101.779	0.511109
308.6	86.6573	-3.72928	454.161	-1.41373	101.657	0.510193
309.8	86.3826	-3.73066	453.932	-1.41277	101.566	0.512635
311	85.8791	-3.73204	453.703	-1.41277	101.596	0.511719
312.2	86.0164	-3.73272	453.795	-1.41277	101.321	0.511109
313.5	85.7417	-3.73307	453.704	-1.41341	101.566	0.511719
314.7	85.6044	-3.73548	453.52	-1.41182	101.321	0.511719
315.9	85.6502	-3.73617	453.063	-1.41213	101.26	0.510803
317.1	85.5586	-3.73548	452.971	-1.41118	101.047	0.512329
318.3	85.4213	-3.73583	452.559	-1.41182	101.016	0.512024
319.5	85.284	-3.73686	451.827	-1.41182	100.864	0.513245
320.8	85.4671	-3.73651	451.277	-1.41277	100.894	0.51355
322	85.4671	-3.7372	450.728	-1.41309	100.681	0.513245
323.2	85.696	-3.73651	450.362	-1.41341	100.711	0.51355
324.4	85.6502	-3.73651	449.171	-1.41533	100.772	0.514771
325.6	85.8333	-3.73686	448.531	-1.41652	100.894	0.515381
326.9	86.1995	-3.73617	447.981	-1.41712	100.894	0.516297
328.1	86.3369	-3.73514	447.111	-1.41908	101.016	0.517212
329.3	86.52	-3.73514	445.83	-1.42131	101.047	0.517823
330.5	86.5657	-3.73341	444.914	-1.42195	101.108	0.518433
331.7	86.7031	-3.73272	444.411	-1.42291	101.077	0.518433
333	86.7489	-3.73169	443.495	-1.42546	101.382	0.521485
334.2	87.0693	-3.73066	442.991	-1.4261	101.352	0.520875
335.4	87.4355	-3.72893	442.076	-1.42801	101.596	0.520569
336.6	87.7102	-3.72756	441.527	-1.43025	101.657	0.523621
337.8	87.8933	-3.72652	441.069	-1.43216	101.84	0.523926
339	88.2138	-3.72514	440.519	-1.43184	101.932	0.525758
340.3	88.58	-3.72308	440.336	-1.43344	102.176	0.526368
341.5	88.8089	-3.72101	440.062	-1.43527	102.481	0.525452
342.7	89.1751	-3.72067	439.558	-1.43527	102.542	0.527284
343.9	89.3582	-3.71894	439.238	-1.43671	102.603	0.527589
345.1	89.8618	-3.71722	439.009	-1.43815	102.756	0.527284
346.4	90.0906	-3.71481	438.688	-1.43847	102.756	0.527589
347.6	90.5484	-3.71309	438.551	-1.4407	102.664	0.527894
348.8	90.9146	-3.71205	438.276	-1.44038	102.664	0.527894
350	91.2809	-3.70964	438.139	-1.44198	102.573	0.52881
351.2	91.6013	-3.70861	437.91	-1.44261	102.664	0.529115
352.5	92.0133	-3.70688	437.635	-1.44325	102.42	0.528199
353.7	92.3795	-3.70447	437.635	-1.44389	102.634	0.528199
354.9	93.112	-3.70309	437.59	-1.44357	102.634	0.527894
356.1	93.5697	-3.70172	437.727	-1.44421	102.695	0.528199
357.3	93.9818	-3.69965	437.59	-1.44485	102.634	0.528199
358.5	94.5769	-3.69827	437.544	-1.44421	102.603	0.527284
359.8	94.5768	-3.69724	437.544	-1.44357	102.481	0.528504
361	95.0804	-3.69414	437.498	-1.44517	102.603	0.527589
362.2	95.584	-3.69345	437.59	-1.44485	102.207	0.526978
363.4	95.7213	-3.69138	437.315	-1.44421	102.42	0.526978
364.6	95.9044	-3.69103	437.452	-1.44453	102.207	0.526673
365.9	95.9044	-3.69069	437.178	-1.44453	102.054	0.526673
367.1	95.9502	-3.69103	437.132	-1.44485	102.054	0.525452
368.3	95.3551	-3.69241	436.72	-1.44517	101.962	0.526063
369.5	95.0346	-3.69276	436.674	-1.44453	101.749	0.525452
370.7	94.3937	-3.69379	436.399	-1.44421	101.932	0.524537
372	94.0733	-3.69448	436.354	-1.44293	101.84	0.524842
373.2	94.0733	-3.69689	436.354	-1.44261	101.718	0.523011
374.4	93.8444	-3.6962	436.262	-1.44166	101.779	0.523926
375.6	93.5697	-3.69758	436.262	-1.44102	101.871	0.524537
376.8	93.4324	-3.69758	436.262	-1.43974	101.871	0.523011
378	93.2035	-3.69827	436.216	-1.4391	101.81	0.522706
379.3	93.112	-3.6993	436.262	-1.43787	102.023	0.52179
380.5	92.9746	-3.70034	436.262	-1.43727	102.115	0.52118
381.7	92.7	-3.70137	436.262	-1.43615	102.207	0.521485
382.9	92.6084	-3.70206	436.445	-1.43615	102.023	0.522401
384.1	92.5626	-3.7024	436.399	-1.43615	102.267	0.522706
385.4	92.7915	-3.7024	436.445	-1.43559	102.207	0.521485
386.6	92.4711	-3.7024	436.491	-1.43376	102.542	0.52118
387.8	92.2422	-3.70206	436.445	-1.43504	102.664	0.520569
389	92.8373	-3.70137	436.537	-1.43372	102.786	0.520875
390.2	92.7	-3.70172	436.582	-1.4344	103	0.519654
391.5	92.8831	-3.70206	437.132	-1.43376	103.153	0.520264
392.7	93.0662	-3.70137	437.086	-1.43312	103.214	0.519349
393.9	92.9289	-3.70172	437.086	-1.43248	103.366	0.519349
395.1	93.112	-3.70103	437.315	-1.4328	103.397	0.519044
396.3	93.2035	-3.69965	437.452	-1.43121	103.427	0.519654
397.5	93.2493	-3.70068	437.544	-1.43184	103.641	0.518433
398.8	93.3866	-3.70103	437.91	-1.43089	103.58	0.518738
400	93.3409	-3.69999	437.864	-1.43089	103.61	0.517823
401.2	93.3866	-3.69896	437.91	-1.43121	103.458	0.517212
402.4	93.3409	-3.69999	438.002	-1.43089	103.488	0.516297
403.6	93.2951	-3.69896	438.185	-1.43089	103.397	0.516602
404.9	93.2035	-3.6993	438.276	-1.43025	103.305	0.515076
406.1	93.4324	-3.69862	438.185	-1.42993	103.549	0.515687
407.3	93.1577	-3.69793	438.322	-1.42961	103.214	0.515381
408.6	93.3409	-3.69793	438.505	-1.42993	103.244	0.514771
409.8	93.3866	-3.69827	438.734	-1.42961	103.214	0.51355
411	93.4782	-3.69793	439.329	-1.42961	103.061	0.513855
412.3	93.4324	-3.69793	439.512	-1.42897	103.122	0.512635
413.5	93.4782	-3.69793	439.512	-1.42833	103.183	0.512635
414.7	93.6155	-3.69758	439.787	-1.42833	103.214	0.511719
415.9	93.5698	-3.69758	440.016	-1.42769	103.091	0.512024
417.1	93.6613	-3.69655	440.245	-1.42706	103.183	0.512024
418.3	93.6155	-3.6962	440.382	-1.42738	103.244	0.512024
419.6	93.6155	-3.69586	440.428	-1.42738	103.275	0.511109
420.8	93.6613	-3.69689	440.611	-1.4261	103.031	0.511414
422	93.7071	-3.69586	440.657	-1.42674	103.122	0.511414
423.2	93.7071	-3.6962	441.115	-1.42578	103.091	0.510193
424.4	93.7986	-3.6962	441.115	-1.42546	103.122	0.510803
425.7	93.9818	-3.69551	441.252	-1.42578	103.153	0.509888
426.9	94.0733	-3.69586	441.389	-1.42514	103.122	0.510193
428.1	94.2564	-3.69448	441.435	-1.42642	102.908	0.509278
429.3	93.9817	-3.69414	441.618	-1.42546	102.756	0.509583
430.5	93.936	-3.69482	442.213	-1.4245	102.786	0.509278
431.8	94.2564	-3.69379	442.167	-1.42514	102.603	0.508667
433	94.3937	-3.69379	442.213	-1.4245	102.664	0.508667
434.2	94.5311	-3.69448	442.167	-1.42386	102.725	0.508972
435.4	94.4853	-3.69448	442.396	-1.42355	102.664	0.508362
436.6	94.76	-3.69379	442.579	-1.42323	102.634	0.508057
437.8	94.8515	-3.69379	442.717	-1.42259	102.451	0.507752
439.1	94.9889	-3.69207	442.946	-1.42259	102.512	0.506226
440.3	95.0804	-3.69276	442.9	-1.42259	102.512	0.506531
441.5	95.1262	-3.69276	443.358	-1.42227	102.603	0.506836
442.7	95.1262	-3.6931	443.22	-1.42131	103	0.506531
443.9	95.2635	-3.69276	443.312	-1.42131	103	0.505615
445.2	95.3551	-3.69276	443.495	-1.42131	102.878	0.506836
446.4	95.4924	-3.69276	443.495	-1.42195	103.275	0.505921
447.6	95.584	-3.69138	443.678	-1.42035	103.336	0.505921
448.8	95.5382	-3.69276	443.678	-1.42007	103.214	0.507447
451.3	95.4466	-3.69172	443.724	-1.42035	103.397	0.506531
452.5	95.2178	-3.69276	443.998	-1.4194	103.488	0.506226
453.7	96.1791	-3.69069	444.411	-1.4194	103.641	0.506836
454.9	97.9644	-3.68552	444.822	-1.42003	103.824	0.50592
456.1	101.031	-3.67622	446.242	-1.42195	104.282	0.506226
457.4	103.458	-3.66795	446.882	-1.4245	104.709	0.506836
458.6	105.884	-3.65968	447.569	-1.4261	104.862	0.505921
459.8	108.264	-3.65107	448.164	-1.42769	105.075	0.505615
461	110.645	-3.64349	448.897	-1.43089	105.38	0.506226
462.2	113.346	-3.63487	449.217	-1.43248	105.228	0.505615
463.5	115.909	-3.62419	449.721	-1.43408	105.106	0.503784
464.7	118.61	-3.61627	450.27	-1.43671	105.167	0.502869
465.9	122.181	-3.60593	450.911	-1.43878	105.106	0.501953
467.1	125.523	-3.59249	451.323	-1.44102	104.892	0.501038
468.3	129.917	-3.57974	452.01	-1.44261	104.678	0.498291
469.5	133.808	-3.56699	452.559	-1.44389	104.618	0.495239
470.8	137.791	-3.55666	452.605	-1.44613	104.495	0.492187
472	141.774	-3.54357	452.651	-1.44676	104.221	0.48883
473.2	144.887	-3.53426	452.376	-1.4474	103.885	0.486389
474.4	148.091	-3.52496	452.147	-1.44836	103.488	0.482421
475.6	151.021	-3.51738	452.101	-1.44804	103.122	0.481201
476.9	152.303	-3.51152	451.002	-1.44804	102.817	0.477844
478.1	150.517	-3.51324	449.4	-1.4474	101.901	0.476623
479.3	149.51	-3.51669	447.661	-1.44549	101.077	0.474181
480.5	148.457	-3.51945	446.287	-1.44325	100.711	0.471435
481.7	147.954	-3.5222	445.372	-1.44038	100.528	0.470519
483	147.359	-3.52358	444.456	-1.43815	100.467	0.467772
484.2	146.992	-3.52496	443.678	-1.43671	100.314	0.466247
485.4	147.404	-3.52393	443.587	-1.43559	100.436	0.465941
486.6	148	-3.52358	443.449	-1.43643	100.253	0.46411
487.8	148	-3.52289	443.083	-1.43559	100.284	0.464415
489	147.816	-3.52324	442.991	-1.43647	100.284	0.46411
490.3	147.45	-3.52358	442.717	-1.43587	100.467	0.464415
491.5	147.45	-3.52324	442.488	-1.43615	100.406	0.46411
492.7	146.947	-3.52289	442.305	-1.43587	100.497	0.46472
493.9	146.809	-3.52393	442.396	-1.43615	100.62	0.463805
495.2	146.763	-3.52255	442.213	-1.43755	100.558	0.464721
496.4	146.901	-3.52393	442.259	-1.43731	100.803	0.464415
497.7	146.947	-3.52289	442.167	-1.43815	100.955	0.464415
498.8	147.13	-3.5222	442.213	-1.43819	101.047	0.464415
500	147.404	-3.5222	442.122	-1.43878	101.047	0.46472
501.3	147.633	-3.52082	442.076	-1.43974	101.413	0.465636
502.5	148.183	-3.52014	442.259	-1.44134	101.474	0.466247
503.7	148.228	-3.51841	441.893	-1.44038	101.779	0.467162
504.9	148.503	-3.51635	442.305	-1.44198	101.871	0.466552
506.1	148.686	-3.51531	442.396	-1.44325	101.932	0.468078
507.3	149.144	-3.51462	442.442	-1.44453	102.176	0.467772
508.6	149.464	-3.51324	442.442	-1.44485	102.237	0.468688
509.8	150.06	-3.51187	442.625	-1.44581	102.542	0.469909
511	150.06	-3.51014	442.9	-1.44708	102.634	0.470824
512.2	150.38	-3.50842	442.946	-1.44804	102.603	0.470519
513.4	150.883	-3.50635	442.946	-1.44772	102.542	0.471129
514.7	151.341	-3.50532	442.854	-1.45027	102.573	0.471435
515.9	151.616	-3.50463	442.717	-1.44964	102.573	0.471129
517.1	151.799	-3.50291	442.946	-1.45059	102.756	0.471435
518.3	151.662	-3.50256	442.991	-1.45155	102.542	0.47174
519.5	151.616	-3.50187	442.762	-1.45283	102.451	0.471435
520.8	151.845	-3.50084	442.717	-1.45219	102.298	0.471129
522	151.845	-3.50084	442.534	-1.45379	102.267	0.470824
523.2	151.799	-3.50084	442.488	-1.45434	102.176	0.470824
524.4	151.708	-3.50015	442.396	-1.45371	101.962	0.47235
525.6	151.616	-3.50084	442.076	-1.45402	101.932	0.471435
526.8	151.753	-3.5005	441.984	-1.45546	101.993	0.470519
528.1	151.57	-3.50015	441.801	-1.45434	101.779	0.471129
529.3	151.662	-3.50015	441.847	-1.4549	101.81	0.470824
530.5	151.524	-3.5005	441.847	-1.45574	101.688	0.47235
531.7	151.387	-3.50084	441.435	-1.45462	101.688	0.471435
532.9	151.387	-3.49946	441.435	-1.45546	101.627	0.472045
534.2	150.883	-3.49877	441.343	-1.45574	101.657	0.47174
535.4	151.387	-3.49843	440.886	-1.45518	101.627	0.47235
536.6	151.387	-3.49877	441.252	-1.45658	101.596	0.471435
537.8	150.929	-3.49912	440.748	-1.45578	101.474	0.473266
539	151.158	-3.49912	441.069	-1.45574	101.596	0.47174
540.3	151.158	-3.49877	440.565	-1.4563	101.566	0.471435
541.5	151.341	-3.49912	440.84	-1.45602	101.566	0.472045
542.7	151.112	-3.49774	440.748	-1.45658	101.413	0.473266
543.9	151.158	-3.49912	440.474	-1.4563	101.535	0.470824
545.1	151.387	-3.49877	440.657	-1.45694	101.505	0.470214
546.3	151.296	-3.49705	440.657	-1.45634	101.627	0.47235
547.6	151.387	-3.49843	440.657	-1.45574	101.688	0.470824
548.8	151.387	-3.49705	440.382	-1.45602	101.779	0.470519
550	151.708	-3.49705	440.382	-1.4563	101.749	0.471435
551.2	151.982	-3.49602	440.519	-1.4569	101.627	0.471435
552.4	151.799	-3.49636	440.611	-1.45662	101.657	0.470824
553.7	151.616	-3.49705	440.428	-1.4563	101.749	0.47174
554.9	151.891	-3.49636	440.565	-1.45602	101.84	0.472655
556.1	151.936	-3.49567	440.748	-1.4569	101.932	0.472045
557.3	152.074	-3.49533	440.703	-1.4563	102.054	0.47235
558.5	152.303	-3.49498	440.886	-1.4563	102.115	0.47174
559.8	152.211	-3.49395	440.703	-1.4569	102.145	0.47174
561	152.44	-3.49361	440.611	-1.45658	101.932	0.47174
562.2	152.486	-3.49361	440.703	-1.45662	102.054	0.47174
563.4	152.531	-3.49395	440.748	-1.45726	102.084	0.47235
564.6	152.76	-3.49257	440.932	-1.45726	102.176	0.470824
565.8	152.623	-3.49188	440.748	-1.4569	102.207	0.470519
567.1	152.852	-3.49223	440.84	-1.4569	102.329	0.47174
568.3	152.806	-3.49188	440.977	-1.45662	102.267	0.470824
569.5	152.989	-3.49085	440.84	-1.45662	102.329	0.470519
570.7	153.035	-3.49119	440.977	-1.45658	102.237	0.470519
571.9	153.172	-3.49085	441.115	-1.45694	102.42	0.469909
573.2	153.447	-3.4905	440.932	-1.45785	102.329	0.470824
574.4	153.31	-3.49119	441.206	-1.4569	102.267	0.471129
575.6	153.264	-3.49085	441.115	-1.4563	102.267	0.471129
576.8	153.218	-3.48982	440.977	-1.45658	101.993	0.470519
578	153.172	-3.49119	441.069	-1.45722	102.084	0.470519
579.3	152.944	-3.49119	440.794	-1.45662	102.237	0.469909
580.5	153.218	-3.49016	441.16	-1.45694	102.115	0.469604
581.7	153.035	-3.48982	441.023	-1.45662	102.084	0.469909
582.9	152.852	-3.49085	441.16	-1.4563	101.901	0.469604
584.1	152.669	-3.4905	441.069	-1.45606	101.932	0.468383
585.3	152.76	-3.48982	441.252	-1.45602	101.749	0.469604
586.6	152.623	-3.49085	441.206	-1.45634	101.627	0.468383
587.8	152.394	-3.49154	441.298	-1.45634	101.871	0.469604
589	152.028	-3.49223	441.343	-1.45546	101.749	0.469298
590.2	152.028	-3.49188	441.343	-1.45574	101.779	0.468383
591.4	151.845	-3.49154	441.481	-1.45518	101.718	0.469604
592.7	151.616	-3.49257	441.298	-1.4549	101.84	0.469909
593.9	151.616	-3.49429	441.801	-1.4543	101.901	0.469298
595.1	151.524	-3.49395	441.71	-1.45375	101.657	0.469604
596.3	151.296	-3.49223	441.938	-1.45379	101.962	0.469298
597.5	150.929	-3.49429	441.893	-1.4543	101.84	0.469298
598.8	150.426	-3.49429	441.71	-1.45462	101.749	0.468383
600	150.197	-3.49498	441.664	-1.45426	101.901	0.470519
601.2	150.014	-3.49498	441.481	-1.45311	101.84	0.468383
602.4	150.151	-3.49567	441.618	-1.45379	101.688	0.469604
603.6	149.876	-3.49567	441.755	-1.45375	101.871	0.468383
604.8	149.51	-3.49567	441.664	-1.45406	101.84	0.468688
606.1	149.51	-3.49671	441.572	-1.45347	101.718	0.469604
607.3	149.281	-3.4974	441.664	-1.45247	101.566	0.468078
608.5	149.327	-3.49808	441.755	-1.45219	101.596	0.468688
609.7	149.052	-3.49843	442.076	-1.45155	101.596	0.468688
612.4	148.457	-3.49912	441.572	-1.45279	101.718	0.468383
613.6	148.411	-3.49981	441.755	-1.45187	101.505	0.468688
614.8	148.686	-3.49946	441.847	-1.45219	101.657	0.468078
616	149.602	-3.49705	442.076	-1.45251	101.779	0.468383
617.3	152.989	-3.48878	443.449	-1.45379	101.993	0.467772
618.5	156.423	-3.4812	444.502	-1.45574	102.359	0.465941
619.7	159.627	-3.47121	445.601	-1.4569	102.542	0.465941
620.9	163.289	-3.46087	446.562	-1.46041	102.725	0.466552
622.1	167.638	-3.44916	447.523	-1.46264	103.061	0.4635
623.4	172.216	-3.43744	448.531	-1.46328	103.336	0.462584
624.6	176.794	-3.42504	449.263	-1.46647	103.702	0.459838
625.8	180.959	-3.41367	449.904	-1.46647	103.58	0.457396
627	183.889	-3.4054	450.133	-1.46711	103.549	0.455565
628.2	187.506	-3.39541	450.27	-1.46775	103.244	0.452513
629.5	190.252	-3.38783	450.728	-1.46903	103.091	0.450682
630.7	193.594	-3.38094	450.545	-1.46839	103.031	0.44702
631.9	196.066	-3.37301	450.545	-1.46839	102.786	0.444884
633.1	199.316	-3.36474	450.865	-1.46871	102.542	0.441221
634.3	202.155	-3.35716	450.819	-1.46934	102.39	0.43878
635.5	205.451	-3.34889	451.186	-1.46934	102.267	0.435728
636.8	207.923	-3.34269	451.186	-1.46966	102.237	0.433287
638	207.327	-3.34062	449.675	-1.46871	101.81	0.431761
639.2	205.863	-3.34338	448.531	-1.46743	101.077	0.43054
640.4	204.581	-3.34476	447.249	-1.46647	100.742	0.428404
641.7	203.665	-3.34786	446.379	-1.46232	100.314	0.426573
642.9	202.246	-3.35061	445.28	-1.46105	99.9481	0.423826
644.1	201.697	-3.35268	444.822	-1.45881	99.9786	0.422605
645.3	202.155	-3.35268	445.006	-1.45849	100.131	0.421995
646.5	202.521	-3.35199	444.685	-1.45913	100.131	0.421689
647.8	202.521	-3.3513	444.502	-1.45849	100.589	0.4223
649	202.612	-3.34993	444.273	-1.45913	100.68	0.421384
650.2	202.475	-3.35096	444.456	-1.45913	100.803	0.421689
651.4	202.2	-3.35096	444.044	-1.45913	101.016	0.4223
652.6	202.063	-3.3513	444.136	-1.46009	101.26	0.421995
653.8	202.109	-3.34993	443.953	-1.46073	101.322	0.421079
655.1	201.88	-3.35096	443.815	-1.46073	101.535	0.423215
656.3	201.788	-3.3513	443.541	-1.462	101.566	0.423521
657.5	202.109	-3.35061	443.632	-1.462	101.962	0.423215
658.7	202.429	-3.34958	443.77	-1.46264	101.81	0.423521
659.9	202.75	-3.34889	443.724	-1.46264	102.267	0.423521
661.2	203.299	-3.34786	443.724	-1.4636	102.207	0.424436
662.4	203.162	-3.34579	443.815	-1.46551	102.756	0.424741
663.6	203.894	-3.34476	443.861	-1.46583	102.939	0.425657
664.8	204.031	-3.34372	443.907	-1.46615	103.031	0.427183
666	204.444	-3.34269	443.907	-1.46743	102.969	0.426267
667.3	204.627	-3.34062	443.998	-1.46871	103.183	0.427793
668.5	204.672	-3.34097	443.678	-1.46998	103.214	0.426878
669.7	204.81	-3.33959	443.678	-1.46998	103.305	0.428404
670.9	204.993	-3.33993	443.587	-1.47094	103.153	0.429014
672.1	205.13	-3.33821	443.724	-1.47186	103.397	0.428709
673.3	205.313	-3.33718	443.815	-1.47282	103.549	0.42993
674.6	205.13	-3.33649	443.449	-1.47337	103.427	0.429319
675.8	205.451	-3.33614	443.358	-1.47477	103.427	0.430235
677	205.313	-3.33477	443.403	-1.47421	103.153	0.42993
678.2	205.268	-3.33408	443.266	-1.47513	103.091	0.430235
679.4	204.993	-3.33339	442.991	-1.47537	103.244	0.430845
680.7	204.856	-3.33546	443.037	-1.47697	103.122	0.430845
681.9	204.993	-3.33442	442.854	-1.4782	103.122	0.430845
683.1	204.535	-3.33477	442.9	-1.47724	103.183	0.43115
684.3	204.306	-3.33373	442.762	-1.47756	102.969	0.43115
685.5	204.123	-3.33477	442.534	-1.47852	103.031	0.431761
686.8	204.031	-3.33408	442.534	-1.47788	103.061	0.432066
688	203.986	-3.33373	442.305	-1.47884	102.969	0.431455
689.2	203.894	-3.33304	442.396	-1.47884	103.061	0.430845
690.4	204.26	-3.33339	442.534	-1.47884	102.969	0.430845
691.6	204.123	-3.33304	442.717	-1.4782	103.031	0.432066
692.8	204.306	-3.33235	442.579	-1.47948	102.908	0.431761
694.1	204.352	-3.33029	442.763	-1.47948	102.939	0.431761
695.3	204.489	-3.33201	442.351	-1.48012	102.908	0.431455
696.5	204.444	-3.33098	442.396	-1.48043	102.817	0.42993
697.7	204.444	-3.33132	442.351	-1.48107	102.817	0.431455
698.9	204.26	-3.33132	442.305	-1.47916	102.725	0.430845
700.2	204.398	-3.33132	442.442	-1.48076	102.634	0.43115
701.4	204.489	-3.33132	442.122	-1.48076	102.512	0.42993
702.6	204.398	-3.33132	442.305	-1.4798	102.573	0.431455
703.8	204.444	-3.33029	442.259	-1.48107	102.542	0.430845
705	204.306	-3.33063	442.213	-1.48043	102.573	0.429319
706.3	204.627	-3.32994	442.259	-1.4798	102.542	0.43054
707.5	204.352	-3.32891	442.351	-1.48107	102.664	0.43054
708.7	204.306	-3.33029	442.579	-1.48043	102.664	0.43054
709.9	204.489	-3.32994	442.671	-1.47948	102.664	0.429624
711.1	204.581	-3.32994	442.671	-1.47884	102.756	0.429319
712.3	204.627	-3.3296	443.037	-1.4798	102.664	0.429014
713.6	204.581	-3.32891	443.129	-1.47916	102.817	0.429624
714.8	204.672	-3.3296	443.083	-1.47884	102.908	0.429014
716	204.856	-3.32891	443.083	-1.47916	102.786	0.43054
717.2	204.901	-3.32822	443.266	-1.47884	102.817	0.42993
718.4	204.764	-3.32891	443.312	-1.47916	102.847	0.429624
719.7	204.764	-3.32925	443.403	-1.47948	103.122	0.43054
720.9	204.764	-3.33029	443.312	-1.47884	102.939	0.43054
722.1	204.718	-3.32925	443.587	-1.47884	103.091	0.430235
723.3	204.581	-3.32925	443.77	-1.47693	103.031	0.429624
724.5	204.856	-3.32925	443.77	-1.4782	103.122	0.42993
725.8	204.444	-3.32891	444.136	-1.47788	103.091	0.430235
727	204.489	-3.32925	444.365	-1.47724	103	0.429319
728.2	204.444	-3.3296	444.136	-1.47756	103	0.429014
729.4	204.535	-3.32891	444.548	-1.47724	103.031	0.428709
731.6	204.444	-3.32925	444.639	-1.47661	102.695	0.428098
732.9	204.215	-3.32925	444.456	-1.47661	102.542	0.428404
734.1	204.581	-3.32925	444.777	-1.47565	102.512	0.427183
735.3	205.222	-3.32822	445.189	-1.47597	102.634	0.428709
736.5	207.236	-3.3234	446.242	-1.47693	102.969	0.426572
737.7	210.486	-3.31616	447.432	-1.47884	103.458	0.427183
739	213.553	-3.30789	448.164	-1.48107	103.824	0.426878
740.2	216.849	-3.301	449.171	-1.48171	103.885	0.426267
741.4	219.642	-3.29238	450.087	-1.48363	104.251	0.426267
742.6	223.167	-3.28343	450.865	-1.48554	104.068	0.425657
743.8	227.332	-3.27378	451.827	-1.48682	104.19	0.42291
745	231.407	-3.26241	452.925	-1.48969	104.526	0.421384
746.3	235.206	-3.25242	453.703	-1.48937	104.282	0.418638
747.5	238.227	-3.24587	453.703	-1.48937	104.434	0.417722
748.7	241.752	-3.23588	454.253	-1.49097	104.221	0.412839
749.9	244.957	-3.22899	454.482	-1.49121	103.885	0.411008
751.1	247.612	-3.22141	454.573	-1.49157	103.671	0.408261
752.4	250.542	-3.21417	454.619	-1.49153	103.519	0.404904
753.6	252.831	-3.20728	454.482	-1.49212	103.061	0.402463
754.8	253.883	-3.20452	453.749	-1.49296	102.634	0.399411
756	252.327	-3.20349	452.055	-1.4924	101.718	0.39819
757.2	250.771	-3.20556	450.774	-1.49129	100.864	0.396054
758.5	249.809	-3.20831	449.629	-1.48969	100.467	0.395749
759.7	249.123	-3.21073	448.531	-1.48842	100.223	0.393612
760.9	249.123	-3.21107	447.844	-1.48586	100.131	0.391171
762.1	249.947	-3.21107	447.752	-1.48522	99.9786	0.389645
763.3	251.137	-3.209	447.661	-1.48554	100.131	0.388119
764.5	252.236	-3.20659	447.432	-1.4849	100.192	0.386288
765.8	253.105	-3.20556	447.478	-1.48267	100.314	0.385983
767	253.792	-3.20452	447.02	-1.48331	100.192	0.385373
768.2	254.021	-3.20418	446.654	-1.48395	100.253	0.383846
769.4	253.655	-3.20384	446.058	-1.48267	100.162	0.383847
770.6	252.785	-3.20418	445.738	-1.48235	100.375	0.382931
771.9	252.739	-3.20452	445.463	-1.48267	100.101	0.383236
773.1	252.922	-3.2028	445.372	-1.48235	100.375	0.384152
774.3	253.426	-3.20452	445.372	-1.48267	100.62	0.383846
775.5	253.929	-3.20211	445.143	-1.48363	100.742	0.384152
776.7	254.799	-3.20108	445.235	-1.48522	100.955	0.382931
778	255.44	-3.19867	445.647	-1.4849	101.138	0.384152
779.2	255.806	-3.1966	445.463	-1.48714	101.352	0.383236
780.4	256.31	-3.19453	445.372	-1.48746	101.535	0.383236
781.6	256.676	-3.19384	445.189	-1.48809	101.596	0.384457
782.8	257.225	-3.19178	445.189	-1.48937	101.505	0.384457
784	257.5	-3.19109	444.96	-1.49029	101.657	0.384152
785.3	258.003	-3.19005	444.96	-1.49125	101.718	0.383847
786.5	258.095	-3.18936	444.868	-1.49185	101.718	0.385067
787.7	258.141	-3.18833	445.097	-1.49212	101.688	0.384762
788.9	257.912	-3.18833	444.685	-1.4924	101.505	0.385067
790.1	258.003	-3.18798	444.456	-1.49352	101.657	0.385373
791.4	257.683	-3.18798	444.227	-1.4944	101.627	0.385067
792.6	257.546	-3.1873	443.861	-1.4944	101.84	0.386593
793.8	257.18	-3.1873	443.541	-1.4944	101.688	0.386288
795	256.996	-3.1873	443.083	-1.49663	101.718	0.386593
796.2	257.088	-3.18626	443.266	-1.49631	101.871	0.388119
797.5	256.676	-3.18695	442.762	-1.49663	101.871	0.388424
798.7	256.31	-3.1873	442.946	-1.49791	102.054	0.388424
799.9	256.127	-3.18488	442.488	-1.49919	102.054	0.38873
801.1	256.356	-3.18661	442.305	-1.49823	101.993	0.38873
802.3	256.127	-3.18626	442.03	-1.49951	102.176	0.388119
803.5	256.127	-3.18557	442.305	-1.49951	102.267	0.38995
804.8	255.898	-3.18523	442.396	-1.50014	102.42	0.38934
806	256.081	-3.18523	442.213	-1.49982	102.451	0.391171
807.2	256.218	-3.18488	442.351	-1.50174	102.512	0.390255
808.4	255.806	-3.18523	442.396	-1.50206	102.42	0.390561
809.6	255.76	-3.18488	442.442	-1.50142	102.359	0.390255
810.9	255.806	-3.18488	442.213	-1.50142	102.084	0.391171
812.1	255.944	-3.18454	442.488	-1.5027	101.993	0.390561
813.3	255.669	-3.18454	442.305	-1.5027	101.657	0.391171
814.5	255.715	-3.18385	442.122	-1.50302	101.84	0.390866
815.7	255.623	-3.18351	441.938	-1.5027	101.718	0.390561
817	255.303	-3.18419	442.213	-1.50302	101.566	0.390866
818.2	255.119	-3.18385	441.893	-1.50302	101.474	0.38995
819.4	255.348	-3.18282	441.755	-1.5027	101.321	0.391476
820.6	255.165	-3.18351	441.527	-1.50334	101.199	0.390255
821.8	255.028	-3.18351	441.893	-1.50365	101.26	0.38934
823	254.936	-3.1842	441.755	-1.50334	100.986	0.390255
824.3	254.845	-3.18351	441.847	-1.5027	100.955	0.390561
825.5	255.257	-3.18247	441.71	-1.50365	100.803	0.38934
826.7	254.891	-3.18247	441.572	-1.50334	100.711	0.38995
827.9	255.028	-3.18385	441.893	-1.50429	100.833	0.388119
829.1	255.028	-3.18351	441.618	-1.50365	100.955	0.390561
830.4	254.936	-3.18213	441.618	-1.50365	100.925	0.390255
831.6	255.074	-3.18282	441.664	-1.50302	101.047	0.390255
832.8	255.119	-3.18109	441.71	-1.50365	100.955	0.38934
834	255.074	-3.18109	441.893	-1.50365	100.925	0.389035
835.2	255.074	-3.18144	441.984	-1.50397	101.016	0.38934
836.5	255.074	-3.18247	441.938	-1.50365	101.047	0.38873
837.7	255.211	-3.18178	441.938	-1.50365	100.864	0.389035
838.9	255.211	-3.18178	441.893	-1.50365	100.925	0.390255
840.1	255.165	-3.18144	441.618	-1.50365	100.986	0.390255
841.3	255.257	-3.18006	441.893	-1.50429	101.138	0.38995
842.5	255.623	-3.1804	441.938	-1.50461	101.138	0.389645
843.8	255.486	-3.17903	441.664	-1.50429	101.077	0.38995
845	255.348	-3.17972	441.801	-1.50461	100.925	0.389035
846.2	255.44	-3.18006	441.71	-1.50461	100.894	0.38934
847.4	255.165	-3.1804	441.527	-1.50461	101.199	0.390255
848.6	254.891	-3.17937	441.389	-1.50429	100.894	0.389645
849.9	255.165	-3.17972	441.252	-1.50365	100.864	0.389645
851.1	254.845	-3.18006	441.252	-1.50429	100.833	0.388424
852.3	254.936	-3.17868	441.206	-1.50493	100.864	0.38934
854.1	254.936	-3.1804	440.84	-1.50525	100.803	0.389645
855.4	254.891	-3.17972	441.115	-1.50397	100.65	0.388119
856.6	254.845	-3.17972	440.932	-1.50525	100.742	0.389035
857.8	255.852	-3.17765	441.343	-1.50525	100.681	0.389035
859	258.003	-3.17248	441.893	-1.50748	101.138	0.388424
860.2	260.659	-3.16766	442.946	-1.5078	101.535	0.388119
861.5	262.947	-3.16146	443.632	-1.51056	101.596	0.388424
862.7	265.374	-3.15594	444.273	-1.51143	101.901	0.387814
863.9	267.8	-3.15008	444.868	-1.51283	101.932	0.387509
865.1	270.547	-3.14354	445.601	-1.51475	102.176	0.388119
866.3	273.476	-3.1363	446.333	-1.5157	102.115	0.386288
867.5	276.635	-3.12734	447.02	-1.51794	102.267	0.384762
868.8	279.839	-3.12045	447.752	-1.51953	102.237	0.383541
870	283.685	-3.11218	448.485	-1.52145	102.451	0.382931
871.2	287.301	-3.10323	449.217	-1.52241	102.481	0.379574
872.4	290.139	-3.09461	449.675	-1.52304	102.451	0.378048
873.6	294.122	-3.08669	450.224	-1.524	102.512	0.375912
874.9	297.51	-3.07911	450.682	-1.5256	102.451	0.373775
876.1	300.394	-3.07084	451.002	-1.52592	102.329	0.370418
877.3	301.721	-3.06774	450.774	-1.52592	101.901	0.367672
878.5	300.943	-3.06601	449.629	-1.5256	101.596	0.367061
879.7	298.929	-3.06705	448.622	-1.52464	100.62	0.366451
881	297.922	-3.06877	447.386	-1.52272	100.284	0.364315
882.2	297.327	-3.07015	446.608	-1.52113	99.9481	0.362484
883.4	297.418	-3.07084	446.196	-1.52049	99.704	0.360652
884.6	297.876	-3.07084	446.104	-1.5189	99.765	0.358516
885.8	298.883	-3.07084	445.967	-1.51698	99.8871	0.357906
887	300.073	-3.06842	445.83	-1.51666	99.826	0.35577
888.3	300.897	-3.06842	445.738	-1.5157	99.9481	0.354549
889.5	301.95	-3.06774	445.784	-1.51475	99.7955	0.353938
890.7	302.362	-3.06567	445.418	-1.51475	99.9176	0.353938
891.9	302.591	-3.06498	445.418	-1.51347	99.8565	0.351497
893.1	302.545	-3.06567	445.051	-1.51347	99.9176	0.352413
894.4	302.454	-3.06463	444.868	-1.51315	100.07	0.352413
895.6	302.774	-3.06498	445.326	-1.51199	100.223	0.351802
896.8	303.324	-3.06498	445.006	-1.51315	100.009	0.352107
898	303.186	-3.0636	444.914	-1.51287	100.375	0.351192
899.2	303.461	-3.06291	444.868	-1.51283	100.314	0.350581
900.5	303.598	-3.06222	445.097	-1.51283	100.253	0.351802
901.7	303.69	-3.06153	445.006	-1.51443	100.406	0.352107
902.9	303.781	-3.06085	444.822	-1.51379	100.101	0.350581
904.1	303.919	-3.0605	444.822	-1.51411	100.253	0.351497
905.3	303.827	-3.0605	445.006	-1.51443	100.162	0.351497
906.5	304.331	-3.05981	445.097	-1.51475	100.284	0.351802
907.8	304.056	-3.05912	445.097	-1.51538	100.314	0.350887
909	304.285	-3.05878	445.143	-1.5157	100.284	0.352107
910.2	304.422	-3.0574	445.189	-1.51507	100.345	0.351497
911.4	304.697	-3.0574	445.006	-1.51602	100.284	0.350886
912.6	304.651	-3.05671	445.051	-1.51602	100.131	0.352107
913.9	304.971	-3.05706	445.143	-1.51634	100.284	0.351192
915.1	304.743	-3.05602	445.143	-1.51666	100.314	0.350887
916.3	304.697	-3.05671	445.051	-1.51634	100.406	0.352107
917.5	304.468	-3.05602	445.006	-1.5157	100.558	0.351802
918.7	304.56	-3.05602	445.326	-1.51762	100.467	0.352413
920	304.743	-3.05464	445.189	-1.5173	100.681	0.352107
921.2	304.926	-3.0543	445.097	-1.5173	100.68	0.350581
922.4	304.743	-3.05464	445.097	-1.51762	100.894	0.351802
923.6	304.88	-3.05464	445.097	-1.51826	100.864	0.352107
924.8	304.88	-3.05395	445.189	-1.51826	100.833	0.352107
926	304.971	-3.05292	445.097	-1.51921	100.864	0.352413
927.3	305.292	-3.05395	445.372	-1.51953	100.864	0.351497
928.5	305.063	-3.05292	445.463	-1.51826	100.803	0.351802
929.7	305.429	-3.05189	445.601	-1.51921	100.925	0.351802
930.9	305.658	-3.05223	445.647	-1.51921	100.925	0.351192
932.1	305.521	-3.05189	445.28	-1.5189	101.016	0.351497
933.4	305.567	-3.05085	445.555	-1.52017	101.077	0.353328
934.6	305.841	-3.0512	445.326	-1.51985	100.986	0.353328
935.8	305.75	-3.05051	445.372	-1.52017	100.894	0.351497
937	305.979	-3.04982	445.463	-1.51985	101.108	0.351802
938.2	305.841	-3.04982	445.326	-1.52081	101.169	0.351802
939.5	305.841	-3.04948	445.326	-1.52081	101.016	0.353633
940.7	305.796	-3.04982	445.143	-1.52081	100.986	0.351802
941.9	305.796	-3.05051	445.051	-1.52177	101.047	0.353328
943.1	305.658	-3.04982	444.868	-1.52177	101.108	0.351497
944.3	305.567	-3.04913	444.777	-1.52145	100.986	0.353023
945.5	305.338	-3.04948	444.777	-1.52177	100.894	0.352107
946.8	305.155	-3.04948	444.685	-1.52241	100.894	0.352413
948	305.246	-3.04913	444.411	-1.52209	100.986	0.353023
949.2	305.429	-3.04879	444.365	-1.52209	100.894	0.352413
950.4	305.338	-3.04844	444.319	-1.52241	101.016	0.352107
951.6	305.429	-3.04913	444.09	-1.52272	101.016	0.352413
952.9	305.384	-3.0481	444.273	-1.52304	101.108	0.353328
954.1	305.612	-3.04879	444.273	-1.52304	101.169	0.352413
955.3	305.796	-3.04741	444.319	-1.52432	101.199	0.352718
956.5	305.841	-3.04706	444.273	-1.52464	101.138	0.354244
957.7	306.024	-3.04637	444.136	-1.524	101.26	0.352718
959	305.841	-3.04603	444.456	-1.52432	101.352	0.353938
960.2	305.933	-3.04569	444.456	-1.52464	101.321	0.353633
961.4	306.024	-3.04603	444.456	-1.52464	101.321	0.354854
962.6	305.796	-3.04637	444.319	-1.52432	101.26	0.355159
963.8	305.658	-3.04637	444.273	-1.52592	101.352	0.353633
965.1	305.658	-3.04603	444.365	-1.52496	101.413	0.353328
966.3	305.475	-3.04637	444.182	-1.5256	101.26	0.354244
967.5	305.612	-3.04603	444.182	-1.5256	101.382	0.354244
968.7	305.109	-3.04637	444.136	-1.52496	101.322	0.354549
971	304.88	-3.04569	444.044	-1.52528	101.26	0.354549
972.2	305.063	-3.04569	443.861	-1.5256	101.474	0.355464
973.4	305.155	-3.04534	444.044	-1.5256	101.444	0.354244
974.6	306.528	-3.04362	444.411	-1.52624	101.413	0.354854
975.8	309	-3.03845	445.097	-1.52879	101.779	0.354854
977.1	311.243	-3.03328	446.104	-1.52991	101.962	0.354549
978.3	313.532	-3.02811	446.562	-1.5313	102.39	0.354854
979.5	315.867	-3.0226	447.249	-1.53222	102.481	0.354244
980.7	317.881	-3.01846	447.89	-1.53414	102.634	0.353938
982	319.895	-3.01226	448.347	-1.53605	102.786	0.354244
983.2	321.589	-3.0071	448.805	-1.53797	102.756	0.353633
984.4	324.244	-3.00089	449.538	-1.53892	102.908	0.353938
985.6	326.304	-2.99538	450.041	-1.54116	103.061	0.352718
986.8	329.096	-2.98918	450.407	-1.54211	103.061	0.352107
988	331.98	-2.98263	450.865	-1.54339	103.061	0.351192
989.3	335.048	-2.97574	451.781	-1.5453	103.214	0.349056
990.5	338.664	-2.96782	452.284	-1.54658	103.214	0.347529
991.7	341.822	-2.95955	453.017	-1.5481	103.275	0.345393
992.9	345.119	-2.95093	453.703	-1.54977	103.061	0.342952
994.1	347.957	-2.94439	454.161	-1.54977	102.817	0.34051
995.4	349.559	-2.93922	454.024	-1.54953	102.39	0.337764
996.6	350.749	-2.93749	453.658	-1.54977	101.871	0.335322
997.8	349.742	-2.93715	452.88	-1.54949	101.26	0.334101
999	348.002	-2.93715	451.644	-1.54922	100.345	0.33166
1000.2	346.538	-2.93784	450.682	-1.54838	99.7955	0.330134
1001.5	345.805	-2.93922	450.133	-1.54563	99.4293	0.327692
1002.7	345.485	-2.9406	449.812	-1.5453	99.3072	0.326777
1003.9	345.988	-2.9406	449.263	-1.54307	99.3072	0.324641
1005.1	346.721	-2.9406	449.309	-1.5418	99.3988	0.323725
1006.3	347.407	-2.93991	449.126	-1.5418	99.2462	0.32403
1007.5	348.048	-2.93956	449.034	-1.54084	99.3683	0.322504
1008.8	349.01	-2.93784	449.034	-1.54052	99.4598	0.321589
1010	349.696	-2.93681	449.034	-1.53988	99.4598	0.320368
1011.2	350.108	-2.93543	448.897	-1.53988	99.3988	0.320063
1012.4	350.841	-2.93612	449.034	-1.53892	99.4598	0.318842
1013.6	350.887	-2.93439	448.851	-1.53765	99.7345	0.318842
1014.9	351.39	-2.9337	448.439	-1.53797	99.8871	0.318232
1016.1	351.711	-2.9337	448.668	-1.53701	99.8871	0.316706
1017.3	351.482	-2.93267	448.073	-1.53701	99.765	0.317621
1018.5	351.07	-2.93405	447.798	-1.53765	99.6429	0.317621
1019.7	350.795	-2.93439	447.752	-1.53701	99.6124	0.317621
1021	351.07	-2.93302	447.707	-1.53765	99.7955	0.318232
1022.2	351.024	-2.93267	447.523	-1.53828	99.6429	0.317316
1023.4	351.619	-2.93267	447.478	-1.53701	99.6124	0.316706
1024.6	352.168	-2.93164	447.523	-1.53733	99.6124	0.317011
1025.8	352.351	-2.93129	447.615	-1.53797	99.7955	0.31579
1027	353.084	-2.92888	447.569	-1.5386	99.9481	0.31457
1028.3	353.725	-2.92854	447.752	-1.53892	99.7955	0.316706
1029.5	354.091	-2.92716	447.707	-1.53892	99.8871	0.315485
1030.7	354.594	-2.92543	447.661	-1.5386	99.7955	0.316095
1031.9	355.098	-2.92475	447.523	-1.54052	99.8871	0.314875
1033.1	355.464	-2.92302	447.661	-1.5402	100.07	0.315485
1034.4	355.876	-2.9213	447.89	-1.54116	100.345	0.314264
1035.6	356.426	-2.92061	447.935	-1.54084	100.406	0.314875
1036.8	356.471	-2.91958	447.844	-1.5418	100.65	0.31579
1038	356.563	-2.91958	448.393	-1.54148	100.68	0.31457
1039.2	356.654	-2.91889	448.073	-1.54148	100.589	0.315485
1040.5	356.471	-2.91854	448.439	-1.54211	100.558	0.31579
1041.7	356.517	-2.91923	448.439	-1.54084	100.65	0.31518
1042.9	356.471	-2.91923	448.485	-1.54211	100.742	0.315485
1044.1	356.38	-2.91889	448.531	-1.54116	100.803	0.31457
1045.3	356.288	-2.91958	448.668	-1.54084	100.589	0.31579
1046.5	356.059	-2.91889	448.805	-1.54116	100.681	0.31518
1047.8	356.426	-2.91923	448.805	-1.54148	100.681	0.31579
1049	356.105	-2.91958	448.668	-1.54084	100.742	0.314875
1050.2	356.288	-2.91923	448.988	-1.54211	100.864	0.31518
1051.4	356.105	-2.91958	448.714	-1.54116	100.955	0.31579
1052.6	355.83	-2.91958	448.851	-1.54211	101.016	0.315485
1053.9	355.922	-2.91958	448.759	-1.5418	101.047	0.31518
1055.1	355.968	-2.91958	448.714	-1.54148	101.077	0.31579
1056.3	355.922	-2.91923	448.759	-1.54084	101.26	0.316095
1057.5	356.243	-2.91889	448.759	-1.5418	101.291	0.31518
1058.7	356.151	-2.91992	448.805	-1.5418	101.23	0.317011
1060	356.014	-2.91923	448.942	-1.5418	101.291	0.317011
1061.2	356.151	-2.91958	448.714	-1.54084	101.26	0.316095
1062.4	356.059	-2.91785	448.805	-1.54275	101.413	0.317927
1063.6	355.968	-2.91785	448.347	-1.54211	101.291	0.316095
1064.8	355.83	-2.91854	448.714	-1.54275	101.352	0.317011
1066	355.876	-2.91785	448.485	-1.54339	101.26	0.316401
1067.3	355.739	-2.91889	448.668	-1.54243	101.26	0.317621
1068.5	355.922	-2.91785	448.668	-1.54275	101.413	0.31579
1069.7	355.647	-2.91854	448.439	-1.5418	101.291	0.317011
1070.9	355.83	-2.91854	448.668	-1.54275	101.505	0.316401
1072.1	355.831	-2.91785	448.439	-1.54243	101.474	0.317316
1073.4	356.014	-2.9182	448.622	-1.5418	101.657	0.317011
1074.6	355.739	-2.91785	448.485	-1.54339	101.566	0.318537
1075.8	355.83	-2.91751	448.714	-1.54243	101.535	0.316706
1077	355.785	-2.91785	448.576	-1.54307	101.474	0.317927
1078.2	355.922	-2.91751	448.485	-1.54275	101.596	0.317011
1079.5	356.014	-2.9182	448.714	-1.54371	101.779	0.318537
1080.7	356.105	-2.91785	448.668	-1.54339	101.779	0.317621
1081.9	356.014	-2.91682	448.576	-1.54275	101.84	0.318537
1083.1	356.471	-2.91613	448.988	-1.54243	101.901	0.318537
1084.3	356.334	-2.91751	448.668	-1.5418	101.932	0.317316
1085.5	355.968	-2.91682	448.622	-1.54339	101.962	0.317621
1086.8	356.197	-2.91717	448.805	-1.54211	101.901	0.317927
1088	356.151	-2.91682	448.576	-1.54211	101.932	0.318232
1089.2	355.831	-2.91613	448.942	-1.54307	102.023	0.318232
1090.4	355.83	-2.91717	448.851	-1.54307	101.993	0.317927
1092.9	356.151	-2.91648	448.622	-1.54307	101.779	0.317927
1094.1	356.059	-2.91613	448.576	-1.5418	101.962	0.318537
1095.3	356.609	-2.91579	448.805	-1.54275	101.718	0.318537
1096.5	357.662	-2.91406	448.988	-1.54371	101.962	0.318232
1097.8	359.63	-2.90924	449.858	-1.54467	102.084	0.318232
1099	361.965	-2.90407	450.682	-1.54594	102.115	0.317927
1100.2	364.345	-2.89925	451.094	-1.5481	102.298	0.317316
1101.4	366.726	-2.89443	451.872	-1.5489	102.725	0.316706
1102.6	368.786	-2.88857	452.284	-1.55041	102.573	0.316095
1103.8	371.166	-2.88374	452.559	-1.55097	102.573	0.316706
1105.1	373.18	-2.87823	453.291	-1.5532	102.664	0.316095
1106.3	375.469	-2.87306	453.612	-1.55448	102.756	0.31579
1107.5	377.255	-2.86789	453.795	-1.55672	102.725	0.316095
1108.7	379.589	-2.86204	454.161	-1.55767	102.695	0.313349
1109.9	381.878	-2.85756	454.299	-1.56023	102.817	0.312128
1111.2	384.304	-2.84998	454.527	-1.56278	102.908	0.312128
1112.4	387.28	-2.84412	455.031	-1.56374	102.969	0.311518
1113.6	390.026	-2.83689	455.077	-1.56625	102.939	0.309992
1114.8	392.728	-2.82999	455.489	-1.56769	102.969	0.308161
1116	395.611	-2.82207	455.534	-1.57004	103.061	0.30694
1117.3	397.9	-2.81656	454.894	-1.57068	102.664	0.304804
1118.5	398.724	-2.81311	454.482	-1.571	102.42	0.302362
1119.7	399.594	-2.80966	453.749	-1.57259	102.084	0.300531
1120.9	400.327	-2.80691	453.017	-1.57323	101.749	0.299615
1122.1	400.922	-2.80519	452.376	-1.57355	101.505	0.2987
1123.3	401.013	-2.80346	451.598	-1.57387	101.016	0.297174
1124.6	400.922	-2.80346	450.728	-1.57419	100.742	0.295953
1125.8	400.372	-2.80243	449.812	-1.57323	100.589	0.296869
1127	399.96	-2.80208	448.897	-1.57355	100.375	0.294733
1128.2	399.594	-2.8014	448.439	-1.57387	100.436	0.293817
1129.4	399.777	-2.80312	447.386	-1.57483	100.406	0.293512
1130.7	399.457	-2.80208	447.157	-1.57291	100.436	0.292596
1131.9	399.457	-2.80312	446.471	-1.57291	100.589	0.292596
1133.1	399.32	-2.80105	446.013	-1.57164	100.772	0.291681
1134.3	399.594	-2.80243	445.555	-1.57291	100.803	0.291376
1135.5	399.686	-2.80174	445.372	-1.57164	100.955	0.291376
1136.8	399.915	-2.80174	445.235	-1.571	100.864	0.289849
1138	400.464	-2.79967	445.189	-1.56976	101.047	0.289239
1139.2	400.555	-2.80036	445.189	-1.5688	101.291	0.29107
1140.4	400.876	-2.80002	444.822	-1.56908	101.321	0.290765
1141.6	401.334	-2.79967	444.639	-1.56828	101.657	0.289849
1142.8	401.517	-2.79864	444.731	-1.56908	101.627	0.289544
1144.1	401.837	-2.79829	444.456	-1.56825	101.84	0.289239
1145.3	401.837	-2.79864	444.182	-1.56828	101.749	0.289544
1146.5	401.654	-2.79692	444.273	-1.56852	101.962	0.289849
1147.7	401.608	-2.79795	443.907	-1.56797	101.962	0.288629
1148.9	401.562	-2.79657	443.77	-1.5688	101.932	0.289239
1150.2	401.7	-2.79761	443.587	-1.5688	102.084	0.288934
1151.4	401.791	-2.79657	443.632	-1.5688	102.207	0.289239
1152.6	401.837	-2.79588	443.449	-1.56908	102.298	0.289239
1153.8	401.791	-2.79519	443.083	-1.57068	102.237	0.289239
1155	401.929	-2.79554	443.22	-1.57132	102.267	0.289849
1156.3	402.066	-2.79347	443.083	-1.57164	102.176	0.289849
1157.5	402.066	-2.79347	442.9	-1.57259	102.39	0.29046
1158.7	402.066	-2.79209	442.854	-1.57323	102.329	0.289544
1159.9	402.524	-2.7914	442.579	-1.57291	102.145	0.289239
1161.1	402.203	-2.79106	442.534	-1.57419	102.298	0.289849
1162.3	402.661	-2.7914	442.442	-1.57483	102.329	0.289849
1163.6	402.661	-2.79037	442.305	-1.57387	102.267	0.289239
1164.8	402.936	-2.78934	442.03	-1.57579	102.207	0.290155
1166	403.027	-2.79003	442.213	-1.57611	102.084	0.289849
1167.2	403.027	-2.78865	441.755	-1.57547	102.145	0.29046
1168.4	403.119	-2.7883	441.847	-1.57738	102.145	0.289849
1169.7	403.439	-2.78727	441.71	-1.57738	101.993	0.290155
1170.9	403.485	-2.78658	441.618	-1.5777	102.023	0.29046
1172.1	403.714	-2.7852	441.435	-1.57802	101.932	0.29046
1173.3	404.218	-2.78451	441.618	-1.57898	102.023	0.289849
1174.5	404.172	-2.78417	441.71	-1.57834	102.115	0.290155
1175.8	404.675	-2.78314	441.481	-1.57866	101.962	0.288934
1177	404.767	-2.78176	441.527	-1.57866	101.901	0.289849
1178.2	405.087	-2.78107	441.252	-1.58057	101.962	0.288324
1179.4	405.454	-2.78072	441.343	-1.58025	101.84	0.288018
1180.6	405.591	-2.77969	441.481	-1.58121	101.749	0.288018
1181.8	406.186	-2.77866	441.206	-1.58025	101.871	0.288018
1183.1	405.957	-2.77831	441.389	-1.58121	101.688	0.286187
1184.3	406.324	-2.77797	441.206	-1.58089	101.688	0.287103
1185.5	406.095	-2.77693	441.069	-1.58121	101.81	0.287408
1186.7	406.369	-2.77624	441.252	-1.58089	101.81	0.286492
1187.9	406.415	-2.7759	441.252	-1.58089	101.718	0.287103
1189.2	406.415	-2.77521	441.435	-1.58121	101.718	0.286798
1190.4	406.415	-2.77452	441.069	-1.58185	101.718	0.287103
1191.6	406.461	-2.77555	440.932	-1.58185	101.627	0.285577
1192.8	406.14	-2.77418	440.703	-1.58185	101.657	0.286187
1194	406.324	-2.77314	440.794	-1.58121	101.413	0.285577
1195.3	406.369	-2.77418	440.703	-1.58121	101.566	0.284661
1196.5	406.415	-2.77383	440.703	-1.58217	101.535	0.284967
1197.7	406.369	-2.77349	440.657	-1.58217	101.505	0.285882
1198.9	406.415	-2.77245	440.703	-1.58217	101.474	0.284051
1200.1	406.415	-2.77349	440.703	-1.58153	101.474	0.284967
1201.4	406.461	-2.77039	441.16	-1.58249	101.535	0.285882
1202.6	406.552	-2.77142	441.069	-1.58217	101.474	0.284051
1203.8	406.644	-2.77108	440.977	-1.58153	101.657	0.283441
1205	406.735	-2.77142	441.023	-1.58153	101.718	0.284661
1206.2	406.873	-2.77108	441.115	-1.58153	101.779	0.28283
1207.5	406.873	-2.77108	441.298	-1.58185	101.871	0.283441
1208.7	406.827	-2.77004	441.481	-1.58217	101.871	0.284051
1209.9	406.873	-2.77108	441.618	-1.58185	101.871	0.283441
1211.1	406.964	-2.77039	441.847	-1.58185	101.749	0.284051
1212.3	406.918	-2.77039	441.893	-1.58153	101.871	0.284356
1213.5	406.69	-2.77108	441.389	-1.58153	101.962	0.283135
1214.8	406.415	-2.77039	441.572	-1.58185	101.932	0.283746
1216	406.415	-2.77039	441.847	-1.58121	101.932	0.283746
1219.1	406.186	-2.77039	441.664	-1.58153	101.84	0.283135
1220.4	406.232	-2.77039	441.664	-1.58121	101.932	0.283746
1221.6	406.049	-2.77073	441.618	-1.58153	101.871	0.284051
1222.8	407.88	-2.76625	442.259	-1.58217	101.993	0.283441
1224	409.848	-2.76281	443.037	-1.58344	102.481	0.283441
1225.2	411.496	-2.75936	443.678	-1.58472	102.634	0.28283
1226.5	413.602	-2.75488	444.09	-1.58568	102.847	0.284051
1227.7	416.303	-2.7504	445.006	-1.58727	103.244	0.283746
1228.9	418.958	-2.7442	445.647	-1.58935	103.671	0.284051
1230.1	421.018	-2.73903	446.379	-1.59075	103.824	0.283441
1231.3	423.673	-2.73386	447.066	-1.59166	104.16	0.284356
1232.5	426.008	-2.72801	447.752	-1.59358	104.312	0.283135
1233.8	428.48	-2.72249	448.21	-1.59518	104.556	0.283135
1235	431.043	-2.7156	448.897	-1.59677	104.465	0.280694
1236.2	433.744	-2.70768	449.217	-1.60028	104.282	0.279473
1237.4	436.262	-2.70147	449.767	-1.6022	104.373	0.277947
1238.6	439.467	-2.69321	450.362	-1.60411	104.19	0.276727
1239.9	442.625	-2.68494	450.774	-1.60603	104.221	0.27459
1241.1	445.372	-2.67839	451.186	-1.60694	104.099	0.271844
1242.3	447.707	-2.6715	451.415	-1.60866	103.915	0.269402
1243.5	448.851	-2.66736	451.186	-1.60922	103.305	0.266655
1244.7	449.721	-2.6653	450.865	-1.60954	102.695	0.263909
1246	450.362	-2.66254	450.453	-1.60866	102.481	0.262383
1247.2	450.819	-2.66047	449.675	-1.60922	102.145	0.260247
1248.4	449.492	-2.66047	448.759	-1.60898	101.322	0.25811
1249.6	447.707	-2.66151	447.707	-1.60782	100.894	0.256889
1250.8	446.333	-2.66254	447.02	-1.60782	100.589	0.256279
1252	445.647	-2.66392	446.471	-1.60634	100.375	0.255364
1253.3	445.372	-2.6653	445.875	-1.60603	100.375	0.255058
1254.5	445.875	-2.66392	445.555	-1.60571	100.436	0.252007
1255.7	446.516	-2.66323	445.738	-1.60411	100.589	0.251396
1256.9	447.02	-2.66357	445.509	-1.60411	100.894	0.251396
1258.1	447.752	-2.66254	445.326	-1.60315	100.864	0.250786
1259.4	448.073	-2.66254	445.372	-1.60251	100.986	0.249565
1260.6	448.622	-2.66082	445.326	-1.6022	101.138	0.250175
1261.8	449.126	-2.65944	445.28	-1.60092	101.23	0.248344
1263	449.721	-2.6591	445.235	-1.60124	101.291	0.246818
1264.2	449.95	-2.65806	444.96	-1.6006	101.382	0.246513
1265.5	450.499	-2.65772	445.143	-1.59964	101.26	0.245598
1266.7	450.957	-2.65737	445.097	-1.59964	101.291	0.245598
1267.9	451.231	-2.65668	444.96	-1.59964	101.321	0.245598
1269.1	451.644	-2.65668	444.868	-1.59901	101.474	0.244377
1270.3	452.01	-2.65599	444.731	-1.59868	101.596	0.243767
1271.5	451.827	-2.65427	444.777	-1.59901	101.657	0.243461
1272.8	452.101	-2.6553	444.685	-1.59709	101.566	0.243461
1274	452.33	-2.65393	444.777	-1.59773	101.657	0.242851
1275.2	452.101	-2.65358	444.639	-1.59645	101.596	0.24163
1276.4	452.284	-2.65393	444.594	-1.59677	101.505	0.242546
1277.6	452.284	-2.65289	444.777	-1.59677	101.627	0.242546
1278.9	452.651	-2.65289	444.868	-1.59773	101.627	0.24163
1280.1	452.605	-2.6522	444.914	-1.59741	101.535	0.241935
1281.3	452.559	-2.65186	444.914	-1.59645	101.627	0.24163
1282.5	453.017	-2.65083	445.235	-1.59645	101.627	0.241325
1283.7	453.475	-2.64979	445.326	-1.59677	101.81	0.241935
1285	454.344	-2.65014	445.83	-1.59805	101.779	0.24163
1286.2	454.94	-2.64807	445.967	-1.59805	101.779	0.243461
1325.8	456.725	-2.63567	446.699	-1.60475	102.176	0.24163
1327	456.633	-2.63636	446.699	-1.60443	102.298	0.24102
1328.2	456.679	-2.6367	446.562	-1.60443	102.176	0.241325
1329.4	456.816	-2.63567	446.608	-1.60507	102.054	0.240715
1330.7	456.587	-2.63567	446.608	-1.60411	102.298	0.241935
1331.9	456.496	-2.63532	446.562	-1.60379	102.298	0.240715
1333.1	456.862	-2.63498	446.608	-1.60475	102.207	0.240715
1334.3	456.633	-2.63601	446.837	-1.60411	102.084	0.240409
1335.5	456.633	-2.63532	446.516	-1.60347	101.932	0.24163
1336.8	456.542	-2.63463	446.699	-1.60411	102.207	0.24102
1338	456.679	-2.63532	446.882	-1.60507	101.993	0.241935
1339.2	456.496	-2.63463	446.745	-1.60443	101.962	0.240715
1340.4	456.496	-2.63394	446.928	-1.60411	102.084	0.240715
1341.6	456.587	-2.63567	447.02	-1.60379	101.871	0.240104
1342.8	456.679	-2.63394	446.928	-1.60443	101.932	0.242241
1344.1	456.587	-2.63394	447.02	-1.60379	102.054	0.241935
1345.3	456.679	-2.63325	447.02	-1.60347	101.84	0.240715
1346.5	456.771	-2.63291	447.02	-1.60411	101.84	0.24163
1347.7	456.679	-2.6336	446.928	-1.60411	101.871	0.24163
1348.9	456.496	-2.6336	447.203	-1.60475	101.596	0.240104
1350.2	456.679	-2.63429	447.432	-1.60475	101.535	0.240104
1351.4	456.679	-2.63291	447.523	-1.60379	101.596	0.240104
1352.6	456.45	-2.63325	447.111	-1.60539	101.566	0.239799
1353.8	456.45	-2.63291	447.157	-1.60347	101.657	0.239189
1355	456.404	-2.63291	447.386	-1.60347	101.535	0.24102
1356.3	456.358	-2.63325	447.523	-1.60475	101.444	0.238578
1357.5	456.404	-2.6336	447.478	-1.60411	101.596	0.239799
1358.7	456.313	-2.6336	447.798	-1.60347	101.505	0.239494
1361	455.947	-2.63325	447.432	-1.60411	101.444	0.238884
1362.2	455.855	-2.63429	447.523	-1.60379	101.352	0.239494
1363.4	455.718	-2.6336	447.523	-1.60315	101.444	0.240104
1364.6	455.763	-2.63394	447.386	-1.60443	101.474	0.238578
1365.8	455.718	-2.63291	446.791	-1.60443	101.382	0.238884
1367	455.031	-2.63291	445.692	-1.60507	101.23	0.239189
1368.3	454.436	-2.63325	443.22	-1.6075	100.894	0.240409
1369.5	453.474	-2.63429	440.84	-1.6101	100.955	0.24163
1370.7	452.605	-2.63532	438.002	-1.61393	100.406	0.241325
1371.9	451.46	-2.63429	434.614	-1.61744	100.528	0.243767
1373.1	451.002	-2.63636	431.41	-1.62127	100.162	0.245903
1374.4	450.316	-2.63636	428.297	-1.6251	100.07	0.248955
1375.6	449.95	-2.63636	425.321	-1.62825	99.9481	0.250786
1376.8	449.583	-2.63601	422.025	-1.63363	99.9481	0.252922
1378	449.217	-2.63636	419.324	-1.6381	99.765	0.254753
1379.2	448.805	-2.63532	416.44	-1.64225	99.704	0.256279
1380.5	448.759	-2.63463	413.648	-1.64672	99.6735	0.259636
1381.7	448.485	-2.63325	410.901	-1.65079	99.6429	0.260857
1382.9	448.256	-2.63222	407.971	-1.65589	99.4903	0.263604
1384.1	448.073	-2.6305	404.904	-1.66164	99.2767	0.264824
1385.3	447.707	-2.62809	401.974	-1.66603	99.4293	0.267266
1386.5	447.707	-2.62567	399.136	-1.67177	99.4903	0.268181
1387.8	447.523	-2.62361	396.435	-1.67752	99.5819	0.268181
1389	447.432	-2.62085	393.826	-1.68254	99.6735	0.270318
1390.2	447.844	-2.61844	391.72	-1.68574	99.6429	0.271233
1391.4	447.89	-2.61568	389.889	-1.6902	99.826	0.272149
1392.6	448.531	-2.61258	388.745	-1.69308	100.162	0.272759
1393.9	449.034	-2.60879	387.829	-1.69627	100.497	0.272759
1395.1	449.767	-2.60569	387.555	-1.69882	100.345	0.272759
1396.3	450.362	-2.60293	386.959	-1.70098	100.558	0.273064
1397.5	451.002	-2.59983	386.731	-1.70241	100.894	0.273369
1398.7	451.598	-2.59604	386.731	-1.70513	101.108	0.273369
1400	452.467	-2.5957	387.051	-1.70417	101.138	0.272454
1401.2	453.063	-2.59191	387.188	-1.7064	101.352	0.274285
1402.4	453.383	-2.58984	387.188	-1.70672	101.505	0.272454
1403.6	453.704	-2.58949	387.509	-1.70704	101.444	0.272759
1404.8	454.07	-2.58846	387.738	-1.70768	101.627	0.271233
1406	454.07	-2.58605	387.875	-1.70832	101.718	0.270928
1407.3	454.07	-2.5857	388.104	-1.708	101.993	0.271538
1408.5	453.474	-2.58674	388.333	-1.70704	101.779	0.270623
1409.7	452.925	-2.5857	388.47	-1.70704	101.535	0.270318
1410.9	452.422	-2.5857	389.111	-1.7064	101.535	0.270012
1412.1	451.735	-2.58605	389.34	-1.70481	101.657	0.269707
1413.4	451.46	-2.58708	390.301	-1.70361	101.596	0.268792
1414.6	451.827	-2.5857	391.308	-1.70297	101.657	0.268181
1415.8	451.644	-2.58708	392.178	-1.7013	101.535	0.266045
1417	451.369	-2.58639	392.728	-1.70074	101.596	0.266045
1418.2	451.369	-2.58639	393.597	-1.69946	101.596	0.264519
1419.5	451.094	-2.58743	394.238	-1.69691	101.688	0.263604
1420.7	450.774	-2.58674	395.062	-1.69531	101.627	0.262688
1421.9	450.636	-2.58812	396.023	-1.69403	101.688	0.263604
1423.1	450.27	-2.58846	396.847	-1.6934	101.779	0.262993
1424.3	450.453	-2.59018	397.58	-1.69116	101.657	0.260857
1425.5	450.407	-2.58915	398.404	-1.68957	101.321	0.260247
1426.8	450.224	-2.58984	398.816	-1.68829	101.291	0.259026
1428	450.27	-2.59122	399.548	-1.68733	101.199	0.259026
1429.2	450.362	-2.59156	399.915	-1.68542	101.047	0.257195
1430.4	450.316	-2.59225	400.555	-1.68366	100.955	0.2575
1431.6	450.499	-2.59156	400.967	-1.68282	100.833	0.257805
1432.9	450.27	-2.59363	400.967	-1.6825	100.711	0.255364
1434.1	450.407	-2.59294	401.379	-1.68131	100.681	0.255364
1435.3	450.499	-2.59191	401.608	-1.67975	100.68	0.255058
1436.5	450.636	-2.59294	402.066	-1.67911	100.497	0.253838
1437.7	450.865	-2.59363	402.387	-1.67975	100.65	0.254143
1439	450.819	-2.59329	402.615	-1.67943	100.589	0.253532
1440.2	450.819	-2.59294	402.524	-1.67848	100.467	0.252007
1441.4	450.957	-2.59432	402.89	-1.67752	100.436	0.252007
1442.6	450.819	-2.59329	402.798	-1.67624	100.162	0.251091
1443.9	450.728	-2.59397	402.844	-1.67592	100.162	0.250786
1445.1	450.865	-2.59432	402.707	-1.67528	100.223	0.250175
1446.3	450.957	-2.59397	403.119	-1.67465	100.04	0.249565
1447.5	451.598	-2.59397	403.348	-1.67465	100.07	0.24926
1448.7	451.644	-2.59397	403.256	-1.67465	99.9176	0.248344
1450	451.689	-2.59501	403.394	-1.67337	99.9176	0.247734
1451.2	451.827	-2.59328	403.348	-1.67305	99.7345	0.248344
1452.4	452.055	-2.59432	403.439	-1.67241	99.9176	0.248039
1453.6	452.01	-2.59328	403.394	-1.67273	99.9176	0.247734
1454.8	451.964	-2.59397	403.256	-1.67209	99.9481	0.247124
1456	452.01	-2.59397	403.256	-1.67305	100.07	0.246513
1457.3	451.872	-2.59432	403.256	-1.67241	99.9481	0.248344
1458.5	451.689	-2.59466	403.165	-1.67241	100.04	0.246818
1459.7	451.872	-2.59535	403.165	-1.67241	100.009	0.248344
1460.9	451.369	-2.59535	403.119	-1.67273	100.162	0.248039
1462.1	451.46	-2.59501	402.844	-1.67209	100.253	0.248955
1463.4	451.46	-2.59432	402.753	-1.67273	100.436	0.248955
1464.6	451.369	-2.59535	402.615	-1.67177	100.467	0.248344
1465.8	451.14	-2.59639	402.341	-1.67241	100.436	0.247734
1467	451.094	-2.5957	402.661	-1.67337	100.681	0.249565
1468.2	450.865	-2.59673	402.341	-1.67273	100.558	0.24926
1469.5	451.14	-2.59707	402.249	-1.67401	100.803	0.250175
1470.7	450.774	-2.59639	402.341	-1.67401	100.681	0.24987
1471.9	450.819	-2.59604	402.112	-1.67337	100.803	0.249565
1473.1	450.636	-2.59673	402.066	-1.67273	100.864	0.24926
1474.3	450.957	-2.59604	402.066	-1.67305	100.894	0.24926
1475.5	451.231	-2.59673	402.203	-1.67369	100.955	0.250481
1476.8	451.918	-2.59639	402.203	-1.67273	100.986	0.24926
1478	452.422	-2.59742	402.158	-1.67369	100.986	0.251091
1479.2	452.788	-2.59604	402.02	-1.67528	101.169	0.250175
1480.4	453.566	-2.59466	402.203	-1.67592	101.291	0.24987
1481.6	454.482	-2.59397	402.387	-1.67528	101.23	0.250175
1482.9	454.756	-2.59294	402.478	-1.67688	101.382	0.251701
1484.1	455.214	-2.5926	402.387	-1.67752	101.291	0.250481
1485.3	455.534	-2.5926	402.432	-1.67688	101.291	0.250481
1486.5	455.855	-2.59156	402.249	-1.6772	101.474	0.250481
1487.7	455.992	-2.59087	402.341	-1.67784	101.291	0.250481
1489	456.13	-2.59087	402.295	-1.67848	101.474	0.249565
1490.2	456.084	-2.58984	402.295	-1.67816	101.413	0.250481
1491.4	456.267	-2.58949	401.974	-1.67816	101.352	0.251396
1492.6	456.221	-2.59018	402.066	-1.6788	101.26	0.252007
1493.8	456.221	-2.58812	401.746	-1.67848	101.413	0.250786
1495	456.175	-2.59018	401.746	-1.67911	101.291	0.251091
1496.3	456.038	-2.58949	401.471	-1.67911	101.291	0.250786
1497.5	455.901	-2.58949	401.288	-1.68007	101.321	0.250786
1498.7	455.947	-2.58984	401.379	-1.67975	101.505	0.250786
1499.9	455.718	-2.58915	401.059	-1.6788	101.26	0.252007
1501.1	455.718	-2.58881	400.83	-1.68039	101.413	0.251396
1502.4	455.672	-2.58881	400.693	-1.67943	101.444	0.251396
1503.6	455.718	-2.58846	400.784	-1.68039	101.596	0.252312
1504.8	455.626	-2.58915	400.693	-1.68071	101.596	0.252007
1506	455.763	-2.58881	400.647	-1.68071	101.26	0.250481
1507.2	455.534	-2.58915	400.464	-1.68071	101.138	0.251701
1508.5	455.626	-2.58915	400.235	-1.68071	101.199	0.251091
1509.7	455.534	-2.58915	400.143	-1.68167	101.108	0.251701
1510.9	455.489	-2.58949	400.235	-1.68199	101.26	0.252007
1512.1	455.626	-2.58984	399.915	-1.68135	101.199	0.250786
1513.3	455.534	-2.58846	400.189	-1.68167	101.23	0.251091
1514.5	455.58	-2.58846	400.098	-1.68191	101.26	0.252007
1515.8	455.443	-2.58881	399.915	-1.68199	101.169	0.252312
1517.6	455.58	-2.58881	399.869	-1.68199	101.199	0.252617
1518.8	455.351	-2.58846	399.823	-1.68135	101.077	0.251396
1520.1	455.763	-2.58846	399.594	-1.68195	101.138	0.252922
1521.3	455.718	-2.58915	399.091	-1.6831	100.986	0.252617
1522.5	454.985	-2.58812	397.717	-1.68482	100.925	0.253838
1523.7	454.39	-2.58812	395.52	-1.68733	100.772	0.255058
1524.9	453.795	-2.58777	393.002	-1.68893	100.253	0.255669
1526.2	452.788	-2.58812	390.026	-1.69372	100.192	0.255974
1527.4	452.284	-2.58846	386.502	-1.69755	99.704	0.259636
1528.6	452.101	-2.58915	384.533	-1.70042	99.4598	0.259636
1529.8	451.735	-2.58881	381.832	-1.70325	99.4903	0.262078
1531	451.827	-2.58881	380.413	-1.7064	99.2767	0.263298
1532.3	452.101	-2.58846	380.367	-1.70672	99.826	0.262993
1533.5	451.506	-2.58777	377.941	-1.71055	99.5514	0.264519
1534.7	450.957	-2.58812	374.508	-1.71406	99.3072	0.268181
1535.9	450.362	-2.58605	370.708	-1.72001	99.002	0.269097
1537.1	449.721	-2.58674	367.046	-1.72452	99.0631	0.271233
1538.3	449.126	-2.58536	363.43	-1.73026	98.8495	0.274285
1539.6	448.897	-2.58364	359.859	-1.73696	98.8495	0.277337
1540.8	448.302	-2.58157	356.334	-1.74263	99.0631	0.278558
1542	448.256	-2.5795	352.626	-1.74965	99.0631	0.281915
1543.2	448.21	-2.57778	348.964	-1.75691	99.3683	0.285577
1544.4	447.752	-2.57399	345.439	-1.76329	99.4598	0.286798
1545.7	447.798	-2.57123	342.647	-1.76936	99.6124	0.29046
1546.9	448.164	-2.56882	340.312	-1.77478	99.8565	0.291681
1548.1	448.347	-2.56469	338.618	-1.77889	100.345	0.293512
1549.3	448.851	-2.56193	337.748	-1.783	100.65	0.294427
1550.5	449.309	-2.55814	336.604	-1.78651	100.864	0.294427
1551.8	450.041	-2.55435	335.917	-1.79002	101.26	0.295343
1553	450.591	-2.54918	335.185	-1.79322	101.382	0.294733
1554.2	451.598	-2.54711	335.185	-1.79533	101.779	0.295648
1555.4	452.422	-2.54229	334.91	-1.79677	101.871	0.295038
1556.6	453.154	-2.5385	335.002	-1.7992	101.993	0.294427
1557.8	453.841	-2.53643	334.864	-1.80079	101.871	0.293512
1559.1	453.978	-2.53333	335.414	-1.80143	102.115	0.292291
1560.3	454.299	-2.53092	336.009	-1.80143	102.176	0.290765
1561.5	454.482	-2.52989	337.245	-1.80079	102.359	0.289544
1562.7	454.711	-2.52851	338.252	-1.80048	102.267	0.287408
1563.9	454.619	-2.52713	339.808	-1.7992	102.451	0.285577
1565.2	454.436	-2.52816	341.182	-1.797	102.481	0.283746
1566.4	454.802	-2.52713	342.784	-1.79505	102.39	0.28161
1567.6	454.39	-2.52748	344.295	-1.79322	102.481	0.283135
1568.8	454.115	-2.52748	346.034	-1.79034	102.298	0.280999
1570	453.887	-2.52816	347.819	-1.78747	102.329	0.279168
1571.3	453.658	-2.52816	349.467	-1.78492	102.145	0.278253
1572.5	453.566	-2.52816	350.795	-1.78236	101.993	0.276727
1573.7	453.978	-2.5292	352.351	-1.78109	101.993	0.276116
1574.9	453.795	-2.52989	353.404	-1.77853	101.81	0.275506
1576.1	453.566	-2.52989	353.725	-1.77798	101.627	0.273675
1577.3	453.154	-2.53092	353.999	-1.77742	101.444	0.274285
1578.6	453.017	-2.53161	354.32	-1.7751	100.986	0.273064
1579.8	452.834	-2.53299	354.411	-1.77415	101.016	0.272149
1581	452.605	-2.53402	354.778	-1.77415	100.62	0.272149
1582.2	452.055	-2.53368	354.457	-1.77223	100.558	0.271538
1583.4	451.506	-2.53574	354.274	-1.77223	100.192	0.271233
1584.7	451.186	-2.53712	354.137	-1.77095	100.101	0.270012
1585.9	451.002	-2.53609	354.274	-1.77159	99.8871	0.270012
1587.1	450.682	-2.53919	353.999	-1.77032	99.7955	0.269707
1588.3	450.362	-2.53919	353.725	-1.77	99.6735	0.268792
1589.5	450.178	-2.53919	353.633	-1.76968	99.6429	0.269097
1590.8	449.858	-2.53988	353.633	-1.76872	99.4903	0.269402
1592	449.995	-2.54022	353.404	-1.76808	99.4903	0.268181
1593.2	449.904	-2.54022	353.45	-1.76872	99.3377	0.268181
1594.4	450.041	-2.54057	353.496	-1.76904	99.4293	0.268181
1595.6	450.224	-2.54057	353.587	-1.76808	99.5514	0.267266
1596.9	450.591	-2.54057	353.587	-1.76808	99.6735	0.267571
1598.1	450.957	-2.54057	354.045	-1.76649	99.6735	0.266655
1599.3	450.957	-2.54091	353.771	-1.7668	99.826	0.267266
1600.5	450.957	-2.54057	353.679	-1.7668	99.704	0.267571
1601.7	451.002	-2.54126	354.32	-1.76585	99.704	0.266045
1603	450.911	-2.54022	353.999	-1.76617	99.8871	0.268181
1604.2	451.048	-2.5416	354.045	-1.76617	99.9481	0.267266
1605.4	451.186	-2.54195	354.045	-1.76585	99.8871	0.267266
1606.6	451.002	-2.54126	353.954	-1.76649	99.9176	0.26635
1607.8	450.865	-2.5416	353.771	-1.76585	99.6735	0.266961
1609	450.682	-2.54298	353.587	-1.76489	99.765	0.267266
1610.3	450.728	-2.54264	353.862	-1.76521	99.5514	0.267571
1611.5	450.636	-2.54401	353.816	-1.76457	99.7955	0.267571
1612.7	450.591	-2.54367	353.679	-1.76521	99.704	0.266961
1613.9	450.591	-2.54332	353.679	-1.76425	99.7955	0.267571
1615.1	450.682	-2.54401	353.587	-1.76521	99.826	0.268487
1616.4	450.636	-2.54436	353.404	-1.76457	99.7955	0.268487
1617.6	450.682	-2.54401	353.267	-1.76425	99.6124	0.269402
1618.8	450.545	-2.54401	353.13	-1.76521	99.7955	0.269097
1620	450.591	-2.54401	353.13	-1.76457	99.8566	0.268487
1621.2	450.591	-2.54436	352.992	-1.76553	99.7955	0.268181
1622.5	450.682	-2.5447	352.855	-1.76521	99.6429	0.268792
1623.7	450.499	-2.54401	352.718	-1.76489	99.8565	0.270012
1624.9	450.499	-2.54505	352.626	-1.76553	100.009	0.268181
1626.1	450.728	-2.5447	352.443	-1.76553	99.8871	0.268792
1627.3	450.453	-2.54436	352.306	-1.76553	99.826	0.268487
1628.5	450.499	-2.5447	351.94	-1.76521	99.7955	0.269707
1629.8	450.499	-2.54401	351.848	-1.76585	99.5819	0.269707
1631	450.728	-2.5447	351.94	-1.76617	99.6124	0.269707
1632.2	450.728	-2.5447	351.527	-1.76553	99.8565	0.268792
1633.4	450.591	-2.5447	351.527	-1.76617	99.7345	0.268792
1634.6	450.636	-2.54401	351.39	-1.76649	99.9176	0.269402
1635.9	450.911	-2.54436	351.024	-1.76712	99.8565	0.270318
1637.1	450.865	-2.54436	350.932	-1.76712	99.9786	0.268181
1638.3	450.911	-2.54436	351.115	-1.7668	99.9481	0.271538
1639.5	450.957	-2.54436	350.932	-1.7668	100.04	0.270623
1640.7	451.002	-2.54436	350.658	-1.7668	100.07	0.270318
1642	451.231	-2.54505	350.429	-1.76712	99.9786	0.271233
1643.2	451.048	-2.5447	350.703	-1.7684	99.765	0.269097
1644.4	450.774	-2.5447	350.474	-1.76744	99.9786	0.269707
1645.6	450.865	-2.5447	350.474	-1.76776	99.8565	0.270928
1646.8	450.819	-2.54401	350.063	-1.76744	99.826	0.269707
1648	450.865	-2.54505	350.291	-1.76776	99.8566	0.270318
1649.3	450.636	-2.54367	350.108	-1.76649	99.7345	0.269707
1650.5	450.728	-2.5447	349.88	-1.76776	99.826	0.270318
1651.7	450.636	-2.54436	349.925	-1.76776	99.7345	0.270623
1652.9	450.407	-2.5447	349.559	-1.76776	99.826	0.270623
1654.1	450.545	-2.54505	349.33	-1.7684	99.765	0.270928
1655.4	450.407	-2.54505	349.33	-1.7684	99.9481	0.270623
1656.6	450.27	-2.54505	349.101	-1.7684	99.826	0.271233
1657.8	450.133	-2.54436	348.918	-1.76808	99.9176	0.270928
1659	450.041	-2.5447	348.918	-1.76968	99.8871	0.270318
1660.2	450.087	-2.54367	348.643	-1.76904	99.9176	0.269707
1662.9	450.316	-2.54367	348.506	-1.76968	100.162	0.270318
1664.1	450.453	-2.54401	348.323	-1.76872	99.8871	0.270623
1665.3	450.499	-2.54436	348.323	-1.76968	100.009	0.269402
1666.5	450.224	-2.54401	347.865	-1.76936	99.9786	0.270623
1667.8	450.27	-2.54401	346.95	-1.77159	99.9786	0.272149
1669	449.629	-2.5447	345.256	-1.77446	99.9176	0.270928
1670.2	449.034	-2.54332	342.692	-1.77714	99.765	0.273675
1671.4	448.851	-2.54401	340.175	-1.77949	99.5209	0.276116
1672.6	448.439	-2.54505	337.245	-1.78236	99.5514	0.277642
1673.9	448.439	-2.54436	334.681	-1.78683	99.3988	0.278863
1675.1	448.759	-2.54367	332.392	-1.79002	99.5209	0.280389
1676.3	450.041	-2.54229	330.424	-1.79449	99.5514	0.281915
1677.5	451.369	-2.5385	327.769	-1.798	99.6124	0.283746
1678.7	452.696	-2.53643	325.297	-1.80239	99.704	0.286187
1680	453.383	-2.53195	322.779	-1.8075	99.9786	0.286798
1681.2	454.161	-2.52885	320.17	-1.81388	99.9786	0.288324
1682.4	454.802	-2.5261	317.515	-1.81899	100.009	0.290155
1683.6	455.168	-2.52162	314.722	-1.82593	100.101	0.293817
1684.8	455.351	-2.51921	311.335	-1.83263	100.07	0.295953
1686	455.077	-2.51576	307.993	-1.83802	100.223	0.296564
1687.3	454.756	-2.51335	304.605	-1.84532	100.375	0.29931
1688.5	454.848	-2.50956	301.218	-1.85202	100.528	0.301447
1689.7	454.802	-2.50542	298.654	-1.85864	100.62	0.303583
1690.9	455.077	-2.50198	295.679	-1.86566	100.894	0.306024
1692.1	455.031	-2.49922	293.298	-1.87201	100.955	0.30694
1693.4	455.397	-2.49336	291.559	-1.87739	101.169	0.30694
1694.6	455.397	-2.49095	289.773	-1.88218	101.474	0.308466
1695.8	455.626	-2.48682	288.949	-1.88601	101.535	0.309381
1697	455.763	-2.48509	287.851	-1.89016	101.566	0.309076
1698.2	455.947	-2.48165	287.21	-1.89283	101.779	0.309687
1699.5	455.626	-2.47855	286.706	-1.89455	101.962	0.309381
1700.7	455.855	-2.47855	286.889	-1.89455	101.962	0.308771
1701.9	456.358	-2.47614	286.935	-1.89614	102.054	0.309992
1703.1	456.358	-2.47235	287.118	-1.89774	102.176	0.308466
1704.3	456.404	-2.47166	287.942	-1.89678	102.267	0.307245
1705.5	456.862	-2.47062	288.858	-1.8971	102.207	0.306635
1706.8	457.045	-2.46925	289.911	-1.89455	102.451	0.305414
1708	457.32	-2.4689	291.284	-1.89395	102.359	0.303583
1709.2	457.686	-2.46752	293.161	-1.89255	102.481	0.301752
1710.4	457.732	-2.46856	294.763	-1.89048	102.542	0.301752
1711.6	457.778	-2.46752	296.32	-1.88761	102.512	0.299005
1712.9	458.098	-2.46821	297.967	-1.88505	102.542	0.299615
1714.1	458.235	-2.46787	299.249	-1.88282	102.329	0.296869
1715.3	458.418	-2.46856	300.897	-1.88059	102.023	0.296258
1716.5	458.052	-2.46787	302.133	-1.87835	101.871	0.293817
1717.7	458.007	-2.46856	303.552	-1.87612	101.535	0.292901
1719	457.915	-2.4689	304.147	-1.87464	101.382	0.291681
1720.2	457.594	-2.46787	304.926	-1.87325	100.894	0.29107
1721.4	457.137	-2.46993	305.338	-1.87205	100.589	0.290155
1722.6	456.496	-2.47028	305.292	-1.87045	100.375	0.288629
1723.8	456.358	-2.47131	305.567	-1.86918	100.101	0.288934
1725	455.901	-2.47304	305.612	-1.86694	100.07	0.286798
1726.3	455.672	-2.47372	305.75	-1.8663	99.826	0.286187
1727.5	455.168	-2.47476	306.07	-1.86598	99.6735	0.285272
1728.7	454.619	-2.4751	306.07	-1.86439	99.5819	0.285272
1729.9	454.299	-2.47579	306.162	-1.86375	99.7345	0.285882
1731.1	453.887	-2.47683	306.345	-1.86311	99.765	0.284661
1732.4	453.475	-2.47924	306.345	-1.86183	99.765	0.284356
1733.6	453.383	-2.47924	306.207	-1.86183	99.9786	0.284356
1734.8	453.063	-2.48062	306.299	-1.86056	100.07	0.285272
1736	452.971	-2.48165	306.299	-1.86024	100.131	0.285882
1737.2	452.651	-2.48165	306.07	-1.86056	100.07	0.285272
1738.5	452.696	-2.48268	306.024	-1.86024	100.192	0.286187
1739.7	452.467	-2.48372	306.024	-1.85992	100.314	0.286187
1740.9	452.605	-2.48372	306.07	-1.8596	100.436	0.286798
1742.1	452.193	-2.48372	305.658	-1.86056	100.528	0.285882
1743.3	452.055	-2.48372	305.796	-1.86056	100.558	0.286492
1744.5	452.055	-2.48509	305.612	-1.85992	100.558	0.286798
1745.8	451.644	-2.48509	305.521	-1.85928	100.711	0.287103
1747	451.735	-2.48613	305.384	-1.86056	100.711	0.287713
1748.2	451.689	-2.48647	305.246	-1.86024	100.925	0.288019
1749.4	451.415	-2.48682	305.063	-1.86056	100.955	0.290155
1750.6	451.552	-2.48682	305.109	-1.85992	101.169	0.288629
1751.9	451.369	-2.48647	304.971	-1.86088	101.26	0.288629
1753.1	451.415	-2.48682	304.834	-1.86024	101.26	0.29046
1754.3	451.14	-2.48682	304.468	-1.86088	101.505	0.289544
1755.5	451.231	-2.48682	304.514	-1.86056	101.657	0.29046
1756.7	451.14	-2.4882	304.376	-1.86247	101.779	0.291986
1758	451.277	-2.48647	304.285	-1.86152	101.688	0.292291
1759.2	451.231	-2.48751	303.964	-1.86183	101.81	0.292596
1760.4	451.002	-2.48785	303.873	-1.86343	101.688	0.291986
1761.6	450.957	-2.48751	303.69	-1.86247	101.779	0.294122
1762.8	451.277	-2.48682	303.919	-1.86247	101.84	0.292596
1764	451.14	-2.48785	303.827	-1.86407	101.993	0.294122
1765.3	451.323	-2.48647	303.781	-1.86439	101.84	0.293206
1766.5	451.186	-2.48716	303.369	-1.86343	101.932	0.293512
1767.7	451.231	-2.48647	303.461	-1.86471	101.871	0.292596
1768.9	451.186	-2.48716	303.507	-1.86471	101.749	0.295038
1770.1	451.002	-2.48716	303.278	-1.86471	101.901	0.293817
1771.4	450.819	-2.48716	303.186	-1.86503	101.871	0.293512
1772.6	451.186	-2.48751	303.186	-1.86598	101.871	0.294122
1773.8	451.094	-2.48751	303.14	-1.86503	101.779	0.293817
1775	451.048	-2.48613	302.774	-1.86662	101.779	0.295038
1776.2	450.865	-2.48716	302.774	-1.8663	101.627	0.295343
1777.5	450.636	-2.48647	302.5	-1.86694	101.566	0.295343
1778.7	450.957	-2.48682	302.683	-1.8663	101.444	0.294427
1779.9	450.819	-2.48751	302.454	-1.86662	101.23	0.295343
1781.1	450.911	-2.48716	302.637	-1.86662	101.23	0.294427
1782.3	451.094	-2.48716	302.362	-1.86662	101.322	0.295648
1783.5	451.002	-2.4882	302.408	-1.86758	101.047	0.295648
1784.8	451.048	-2.48716	302.179	-1.86822	101.077	0.295953
1786	451.048	-2.48682	301.996	-1.86822	101.016	0.294427
1787.2	451.186	-2.48785	302.087	-1.8679	100.864	0.294733
1788.4	451.002	-2.48682	301.767	-1.86854	100.894	0.294733
1789.6	450.957	-2.48682	301.447	-1.86822	100.772	0.294427
1792.4	451.231	-2.48647	301.492	-1.86822	100.894	0.294427
1793.6	451.277	-2.48682	301.263	-1.86949	100.986	0.295038
1794.8	451.094	-2.48716	301.126	-1.86981	100.62	0.294427
1796	451.231	-2.48682	300.714	-1.86949	100.62	0.294122
1797.3	450.774	-2.48716	299.844	-1.87173	100.253	0.295343
1798.5	450.362	-2.48716	297.51	-1.87352	100.162	0.294733
1799.7	450.362	-2.48647	294.992	-1.87644	100.04	0.296869
1800.9	449.904	-2.48647	292.566	-1.87963	99.704	0.296258
1802.1	449.767	-2.48716	289.773	-1.8825	99.5514	0.298395
1803.4	450.133	-2.48647	287.118	-1.88761	99.5209	0.300226
1804.6	450.545	-2.48372	284.143	-1.89255	99.5209	0.301447
1805.8	451.14	-2.48199	281.991	-1.89646	99.5209	0.303888
1807	451.552	-2.47924	279.428	-1.90093	99.3988	0.304498
1808.2	452.01	-2.47717	276.818	-1.90508	99.5819	0.306024
1809.5	452.467	-2.47545	274.529	-1.91015	99.4293	0.308161
1810.7	452.33	-2.47235	271.874	-1.91553	99.3377	0.309687
1811.9	452.742	-2.47028	269.86	-1.92032	99.3683	0.311823
1813.1	452.696	-2.46752	267.342	-1.92575	99.3988	0.313349
1814.3	452.605	-2.46615	265.053	-1.93033	99.3988	0.313959
1815.5	452.925	-2.46408	262.581	-1.93556	99.3988	0.316401
1816.8	452.696	-2.4596	260.247	-1.94099	99.4293	0.317011
1818	452.788	-2.45822	257.912	-1.94705	99.4903	0.318842
1819.2	452.467	-2.45546	255.394	-1.95272	99.5209	0.320063
1820.4	452.467	-2.45236	253.288	-1.95814	99.5819	0.320368
1821.6	452.651	-2.44857	251.274	-1.96357	99.6735	0.322199
1822.9	452.742	-2.44685	249.535	-1.96784	99.7345	0.324335
1824.1	452.651	-2.44375	247.703	-1.97274	99.5819	0.324641
1825.3	452.834	-2.43996	246.284	-1.97753	99.765	0.325251
1826.5	453.017	-2.4372	244.591	-1.98136	99.7955	0.325251
1827.7	453.291	-2.43582	243.767	-1.98539	99.8566	0.325251
1829	453.383	-2.43238	242.576	-1.9883	100.009	0.326777
1830.2	453.52	-2.43031	241.844	-1.9915	99.9176	0.326167
1831.4	453.704	-2.42687	241.066	-1.99437	100.162	0.327387
1832.6	453.978	-2.42549	240.287	-1.99628	100.162	0.327082
1833.8	453.887	-2.42411	239.875	-1.99788	100.192	0.327082
1835	454.07	-2.4217	239.326	-2.00043	100.192	0.326472
1836.3	454.07	-2.41963	239.006	-2.00139	100.192	0.326472
1837.5	454.024	-2.41929	238.777	-2.00235	100.192	0.328608
1838.7	454.299	-2.41756	239.006	-2.0045	100.314	0.327082
1839.9	454.527	-2.41687	238.914	-2.00478	100.375	0.326777
1841.1	454.573	-2.41446	239.235	-2.00394	100.558	0.326167
1842.4	454.619	-2.41412	239.28	-2.00422	100.711	0.325861
1843.6	454.894	-2.4124	239.601	-2.00618	100.498	0.325251
1844.8	454.848	-2.41102	239.464	-2.00562	100.894	0.325556
1846	455.031	-2.41136	239.967	-2.00478	100.711	0.324641
1847.2	455.077	-2.41067	240.654	-2.00422	100.803	0.324946
1848.5	455.26	-2.40964	240.974	-2.00478	101.016	0.324335
1849.7	455.397	-2.40998	241.981	-2.00298	101.047	0.32281
1850.9	455.626	-2.40895	242.668	-2.00298	101.047	0.320978
1852.1	455.534	-2.40895	243.583	-2.00043	101.413	0.321589
1853.3	455.809	-2.40929	244.728	-1.99979	101.352	0.321284
1854.5	455.718	-2.40861	245.46	-1.99979	101.413	0.321284
1855.8	455.947	-2.40895	246.284	-1.99724	101.535	0.319758
1857	455.947	-2.40929	247.475	-1.9966	101.718	0.320063
1858.2	455.809	-2.40826	247.887	-1.99437	101.688	0.320978
1859.4	455.855	-2.40861	248.756	-1.99437	101.688	0.319147
1860.6	455.809	-2.40964	249.489	-1.99181	101.718	0.317316
1861.9	455.397	-2.40895	249.947	-1.9915	101.444	0.319147
1863.1	455.26	-2.40929	250.221	-1.99086	101.413	0.318842
1864.3	455.214	-2.40929	250.908	-1.98862	101.138	0.317621
1865.5	454.94	-2.40929	251.778	-1.98798	100.986	0.317316
1866.7	454.619	-2.40998	252.098	-1.98747	100.894	0.316095
1868	454.344	-2.41102	252.098	-1.98575	100.925	0.316095
1869.2	454.253	-2.41171	252.693	-1.98519	100.711	0.31579
1870.4	453.887	-2.41205	252.648	-1.98423	100.65	0.314875
1871.6	453.566	-2.41274	252.968	-1.9836	100.345	0.313349
1872.8	453.383	-2.41308	253.014	-1.98232	100.345	0.314264
1874	453.795	-2.41343	253.426	-1.98264	100.223	0.313044
1875.3	453.337	-2.41308	253.655	-1.982	100.162	0.313654
1876.5	453.108	-2.41377	253.517	-1.98072	100.223	0.312128
1877.7	452.925	-2.41481	253.609	-1.98009	100.04	0.311823
1878.9	453.017	-2.41619	254.158	-1.97881	100.101	0.311823
1880.1	452.559	-2.41584	254.021	-1.97977	99.9481	0.313654
1881.4	452.651	-2.41619	254.067	-1.97977	99.9176	0.313044
1882.6	452.376	-2.41756	254.25	-1.97785	99.9481	0.310297
1883.8	452.101	-2.41687	254.158	-1.97817	99.8871	0.312128
1885	451.827	-2.41894	254.296	-1.97625	99.6124	0.311823
1886.2	451.277	-2.41825	254.25	-1.97721	99.9481	0.311518
1887.5	451.231	-2.41997	254.387	-1.97689	99.7955	0.311823
1888.7	451.231	-2.41997	254.616	-1.97689	99.8871	0.311823
1889.9	451.14	-2.41997	254.524	-1.97562	99.7955	0.311213
1891.1	451.277	-2.41997	254.57	-1.9753	99.9176	0.312128
1892.3	451.598	-2.42032	254.708	-1.97562	99.9786	0.310907
1893.5	451.506	-2.42032	254.799	-1.97466	100.04	0.311518
1894.8	451.369	-2.41963	254.753	-1.9753	100.131	0.312738
1896	451.552	-2.41997	254.57	-1.97498	100.101	0.311213
1897.2	451.598	-2.42066	254.753	-1.9753	99.9481	0.312433
1898.4	451.872	-2.42032	254.799	-1.97434	99.9176	0.311518
1899.6	451.598	-2.42032	254.616	-1.97466	99.9481	0.311823
1900.9	451.323	-2.4217	254.616	-1.97434	100.009	0.312433
1902.1	451.46	-2.42066	254.708	-1.97466	99.9786	0.311518
1903.3	451.644	-2.42101	254.524	-1.97498	99.8565	0.312128
1904.5	451.872	-2.42101	254.57	-1.97562	99.9786	0.311213
1905.7	451.689	-2.4217	254.478	-1.97498	99.9481	0.311213
1907	451.598	-2.42135	254.433	-1.97498	100.07	0.312433
1908.2	451.872	-2.42066	254.204	-1.97498	100.101	0.310907
1909.4	451.46	-2.41963	254.112	-1.97562	100.04	0.311823
1910.6	452.101	-2.42066	253.975	-1.97562	100.009	0.311823
1911.8	451.964	-2.42101	253.975	-1.9753	99.9176	0.312128
1913	451.872	-2.42066	253.838	-1.97593	100.04	0.312128
1914.3	451.964	-2.4217	253.746	-1.97562	99.9481	0.311518
1915.5	451.918	-2.42066	253.563	-1.97657	100.04	0.311518
1916.7	451.827	-2.42066	253.334	-1.97562	99.826	0.311518
1917.9	452.193	-2.4217	253.288	-1.97625	99.8566	0.312433
1919.1	452.193	-2.42032	253.151	-1.97689	99.8871	0.311518
1920.4	452.147	-2.42239	253.014	-1.97657	99.9481	0.313349
1922.8	452.101	-2.42032	253.197	-1.97657	99.9786	0.311213
1924	452.193	-2.42101	253.197	-1.97721	99.9481	0.313654
1925.2	452.101	-2.4217	252.602	-1.97689	99.9481	0.312433
1926.4	451.598	-2.42066	251.778	-1.97817	100.009	0.311518
1927.6	451.415	-2.42032	250.45	-1.9804	99.826	0.312128
1928.9	450.865	-2.42066	248.756	-1.982	99.704	0.313349
1930.1	450.27	-2.42135	246.605	-1.98515	99.3988	0.31518
1931.3	449.858	-2.42239	244.041	-1.9883	99.2462	0.317011
1932.5	449.08	-2.42135	241.02	-1.99118	98.8495	0.317316
1933.7	449.171	-2.42101	238.182	-1.9966	98.9105	0.319758
1935	449.538	-2.42239	235.572	-2.00139	98.6969	0.321589
1936.2	450.041	-2.42066	232.963	-2.00534	98.6663	0.32281
1937.4	450.362	-2.42032	230.033	-2.01024	98.6358	0.324946
1938.6	450.682	-2.41722	227.561	-2.01503	98.6358	0.325556
1939.8	451.048	-2.41619	225.227	-2.02014	98.7579	0.328913
1941	451.552	-2.41446	222.938	-2.02549	98.9715	0.330134
1942.3	451.735	-2.41136	220.466	-2.03091	99.0631	0.331965
1943.5	451.827	-2.40861	218.268	-2.03697	99.0631	0.335017
1944.7	452.376	-2.40585	216.025	-2.04144	99.3683	0.335627
1945.9	452.422	-2.40378	213.645	-2.04775	99.5514	0.338069
1947.1	452.422	-2.40137	211.127	-2.05349	99.5209	0.340815
1948.4	452.467	-2.39861	209.204	-2.06019	99.6429	0.342952
1949.6	452.422	-2.39482	206.504	-2.06534	99.6124	0.345088
1950.8	452.605	-2.39276	204.718	-2.07033	99.704	0.345698
1952	452.422	-2.38931	202.383	-2.07703	99.6735	0.347224
1953.2	452.559	-2.38586	200.232	-2.08242	99.9481	0.349056
1954.5	452.559	-2.38207	198.355	-2.08876	99.826	0.349361
1955.7	452.834	-2.37966	196.753	-2.09418	99.9786	0.351497
1956.9	452.925	-2.37518	195.059	-2.09897	100.07	0.352107
1958.1	453.246	-2.37346	193.915	-2.10368	100.223	0.353023
1959.3	453.337	-2.36932	192.724	-2.10783	100.192	0.353328
1960.5	453.612	-2.36657	191.58	-2.11198	100.314	0.354244
1961.8	453.932	-2.36347	190.664	-2.11581	100.345	0.353023
1963	453.932	-2.36037	190.252	-2.11804	100.497	0.353938
1964.2	454.207	-2.3583	189.566	-2.12159	100.65	0.353328
1965.4	454.619	-2.3552	188.971	-2.12339	100.68	0.353938
1966.6	454.573	-2.35382	188.925	-2.1253	100.742	0.353938
1967.9	454.756	-2.35175	188.696	-2.12594	100.803	0.354549
1969.1	454.985	-2.35072	188.787	-2.12913	100.711	0.354549
1970.3	455.26	-2.34796	188.742	-2.12818	100.925	0.353023
1971.5	455.351	-2.34762	189.016	-2.12913	100.925	0.353328
1972.7	455.489	-2.3459	189.108	-2.12913	101.047	0.353023
1974	455.763	-2.34486	189.428	-2.12913	101.077	0.351497
1975.2	455.718	-2.34417	190.024	-2.12977	101.016	0.350887
1976.4	456.038	-2.34348	190.802	-2.12977	100.864	0.34875
1977.6	455.855	-2.3428	191.534	-2.12818	100.955	0.349056
1978.8	456.13	-2.34142	192.129	-2.12786	101.077	0.347835
1980	456.084	-2.34073	192.77	-2.12754	101.016	0.345698
1981.3	456.175	-2.34004	193.777	-2.12594	100.955	0.347224
1982.5	456.13	-2.33935	194.464	-2.12435	101.016	0.345698
1983.7	456.221	-2.33935	195.746	-2.12307	101.108	0.343867
1984.9	456.313	-2.34073	196.661	-2.12048	101.138	0.343562
1986.1	456.221	-2.33969	197.668	-2.11928	101.169	0.342341
1987.4	456.404	-2.33969	198.721	-2.11772	100.986	0.342036
1988.6	456.542	-2.34038	199.591	-2.11708	100.742	0.339595
1989.8	456.404	-2.34004	200.598	-2.11421	100.833	0.340205
1991	456.267	-2.34004	201.468	-2.11389	100.742	0.33929
1992.2	456.175	-2.34038	202.338	-2.11134	100.925	0.337764
1993.5	456.175	-2.34004	202.75	-2.11006	100.65	0.338374
1994.7	456.175	-2.33969	203.391	-2.10943	100.436	0.336543
1995.9	456.175	-2.34073	203.665	-2.10719	100.253	0.336238
1997.1	455.809	-2.34107	204.306	-2.10687	100.253	0.335933
1998.3	455.672	-2.34142	204.718	-2.10623	99.9176	0.334101
1999.5	455.397	-2.34211	204.993	-2.1034	99.8871	0.333796
2000.8	455.26	-2.34348	205.222	-2.10284	99.826	0.333186
2002	454.848	-2.34383	205.13	-2.10284	99.704	0.333186
2003.2	454.848	-2.34417	205.405	-2.10117	99.7955	0.332881
2004.4	455.077	-2.34452	205.588	-2.10173	99.7955	0.333796
2005.6	454.94	-2.34659	205.679	-2.10057	99.6124	0.33227
2006.9	454.527	-2.34624	205.908	-2.10025	99.5209	0.331965
2008.1	454.527	-2.3459	205.954	-2.09897	99.3988	0.331965
2009.3	454.436	-2.34693	205.908	-2.0977	99.3072	0.33227
2010.5	454.161	-2.34762	206.046	-2.09802	99.2462	0.330439
2011.7	453.887	-2.34865	206	-2.09674	99.2157	0.331049
2013	453.795	-2.34865	205.542	-2.09738	99.1546	0.331355
2014.2	453.932	-2.34865	205.863	-2.09546	99.0326	0.330439
2015.4	453.704	-2.34969	205.908	-2.09642	99.0326	0.331355
2016.6	453.658	-2.35003	205.954	-2.09514	99.2157	0.33166
2017.8	453.429	-2.35072	205.863	-2.09546	99.1546	0.331049
2019	453.2	-2.35038	205.908	-2.09482	99.1241	0.330439
2020.3	453.154	-2.35072	205.954	-2.09546	99.1546	0.330744
2021.5	453.2	-2.35106	205.908	-2.0945	98.9715	0.328913
2022.7	453.063	-2.35141	205.634	-2.0945	99.3072	0.330439
2023.9	452.971	-2.3521	205.725	-2.0945	99.2157	0.330439
2025.1	453.108	-2.35106	205.908	-2.0945	99.1852	0.330439
2026.4	452.651	-2.35244	205.451	-2.09387	98.9715	0.329218
2027.6	452.696	-2.35175	205.359	-2.09418	98.8189	0.330744
2028.8	452.834	-2.3521	205.451	-2.09355	98.8189	0.328913
2030	452.651	-2.35244	205.313	-2.09323	98.7274	0.328913
2031.2	452.788	-2.35244	204.947	-2.09291	98.7884	0.329218
2032.5	452.696	-2.35313	205.084	-2.09418	98.6663	0.329524
2033.7	452.696	-2.35313	204.901	-2.09418	98.6663	0.329524
2034.9	452.651	-2.35279	204.764	-2.09418	98.7274	0.329218
2036.1	452.513	-2.35348	204.672	-2.09387	98.7579	0.329524
2037.3	452.742	-2.35348	204.672	-2.09418	98.7579	0.330439
2038.5	452.605	-2.35279	204.535	-2.09387	98.88	0.329218
2039.8	452.88	-2.35313	204.398	-2.09418	99.0326	0.329218
2041	452.925	-2.35348	204.444	-2.09482	99.1546	0.329524
2042.2	452.834	-2.35279	204.215	-2.09291	99.1546	0.329218
2043.4	452.742	-2.35244	204.169	-2.0945	99.2767	0.330744
2044.6	453.2	-2.35313	204.26	-2.0945	99.3377	0.330134
2045.9	453.017	-2.35417	204.123	-2.09418	99.5514	0.33166
2047.1	452.696	-2.35417	203.848	-2.09482	99.6735	0.33166
2048.3	452.513	-2.35382	203.848	-2.09514	99.7955	0.330744
2049.5	452.788	-2.35348	203.711	-2.09546	99.9481	0.33166
2050.7	452.788	-2.35279	203.803	-2.09546	99.9481	0.33166
2052	453.063	-2.35279	203.665	-2.09514	100.223	0.332576
2053.2	452.788	-2.35313	203.482	-2.09674	100.131	0.331965
2054.4	452.696	-2.35348	203.391	-2.09546	100.162	0.331965
2055.6	452.605	-2.35348	203.574	-2.09578	100.284	0.333186
2056.8	452.467	-2.35417	203.253	-2.09578	100.345	0.332881
2058	452.376	-2.35348	203.345	-2.09546	100.375	0.333491
2059.3	452.239	-2.35279	203.07	-2.09738	100.406	0.332575
2060.5	452.101	-2.35348	203.116	-2.09738	100.284	0.334712
2061.7	451.827	-2.35417	202.75	-2.09802	100.436	0.334101
2062.9	451.918	-2.35382	202.75	-2.09865	100.497	0.334407
2065.6	451.552	-2.35417	202.796	-2.0977	100.498	0.334712
2066.9	451.735	-2.35382	202.383	-2.0977	100.497	0.333796
2068.1	451.186	-2.35417	202.109	-2.0977	100.497	0.335322
2069.3	451.415	-2.35417	202.063	-2.09993	100.223	0.334712
2070.5	450.865	-2.35485	200.964	-2.10025	100.223	0.335017
2071.7	450.362	-2.35417	198.813	-2.10284	100.04	0.336848
2073	449.995	-2.35451	196.799	-2.10623	99.6735	0.338374
2074.2	449.538	-2.35451	194.464	-2.10975	99.6124	0.33929
2075.4	449.629	-2.35485	192.083	-2.11389	99.5819	0.341426
2076.6	449.95	-2.35554	189.383	-2.11772	99.2767	0.342036
2077.8	449.995	-2.35485	186.956	-2.12215	99.1852	0.344478
2079	450.545	-2.35417	184.53	-2.1269	99.1241	0.346309
2080.3	451.048	-2.35244	181.921	-2.13264	99.2767	0.347835
2081.5	451.277	-2.35038	179.586	-2.13775	99.3072	0.34875
2082.7	451.689	-2.34693	177.297	-2.14182	99.1852	0.350581
2083.9	451.781	-2.3459	174.825	-2.14884	99.3072	0.352107
2085.1	451.872	-2.34314	172.582	-2.15427	99.3072	0.355464
2086.4	452.147	-2.34073	170.064	-2.16057	99.2767	0.358516
2087.6	451.918	-2.33797	168.004	-2.16663	99.2462	0.360042
2088.8	452.147	-2.33556	165.578	-2.1727	99.1852	0.362178
2090	451.827	-2.33246	163.198	-2.17932	99.0936	0.362789
2091.2	451.964	-2.32832	160.726	-2.18698	99.0936	0.365841
2092.5	451.369	-2.32694	158.574	-2.19177	98.941	0.367367
2093.7	451.277	-2.32384	156.194	-2.20031	98.8495	0.368587
2094.9	451.277	-2.32005	153.859	-2.20669	98.9105	0.369808
2096.1	451.002	-2.3173	151.891	-2.21395	98.941	0.371639
2097.3	450.911	-2.31454	150.014	-2.21906	98.941	0.371944
2098.5	450.682	-2.31041	147.862	-2.22576	98.9105	0.37286
2099.8	450.819	-2.30834	146.397	-2.23119	98.9105	0.373165
2101	450.911	-2.30593	144.795	-2.23621	99.0631	0.374996
2102.2	451.094	-2.30214	143.422	-2.24132	99.1546	0.376522
2103.4	451.323	-2.29869	141.957	-2.24738	99.3988	0.377438
2104.6	451.46	-2.29421	140.995	-2.25257	99.3988	0.377438
2105.9	451.872	-2.29215	140.309	-2.25592	99.6124	0.378964
2107.1	452.147	-2.2887	139.668	-2.26007	99.7955	0.377132
2108.3	452.696	-2.28491	139.119	-2.2639	99.7345	0.378353
2109.5	453.291	-2.28319	138.569	-2.26677	100.009	0.378964
2110.7	453.474	-2.27871	138.478	-2.27028	100.223	0.379269
2112	454.39	-2.27561	138.02	-2.27252	100.07	0.379574
2113.2	455.031	-2.27319	138.112	-2.27423	100.162	0.377438
2114.4	455.443	-2.27044	137.974	-2.27567	100.253	0.379574
2115.6	455.901	-2.26803	138.295	-2.27659	100.467	0.377438
2116.8	456.13	-2.26561	138.524	-2.27723	100.497	0.376827
2118	455.901	-2.26492	138.798	-2.27754	100.62	0.376522
2119.3	456.13	-2.26286	139.302	-2.27818	100.65	0.376217
2120.5	456.221	-2.26251	139.531	-2.27786	100.711	0.37347
2121.7	456.175	-2.26182	140.217	-2.27786	100.833	0.373165
2122.9	456.771	-2.2601	141.087	-2.27754	100.803	0.370724
2124.1	456.908	-2.25872	141.636	-2.27786	100.803	0.370724
2125.4	457.137	-2.25872	142.598	-2.27539	100.589	0.369808
2126.6	457.183	-2.25907	143.651	-2.27535	100.772	0.369198
2127.8	457.411	-2.25734	144.337	-2.27336	100.772	0.367672
2129	457.183	-2.25803	145.528	-2.2706	100.711	0.368587
2130.2	457.411	-2.25769	146.535	-2.27028	100.742	0.367366
2131.5	457.045	-2.25907	147.542	-2.26741	100.62	0.366451
2132.7	456.999	-2.25769	148.137	-2.2655	100.558	0.36462
2133.9	456.816	-2.25803	149.19	-2.2639	100.65	0.364925
2135.1	456.542	-2.25734	149.922	-2.26199	100.436	0.36462
2136.3	456.358	-2.25838	150.746	-2.26007	100.314	0.363399
2137.5	456.175	-2.25941	151.341	-2.25975	100.253	0.364315
2138.8	455.58	-2.26045	152.028	-2.25688	100.528	0.362789
2140	455.443	-2.26113	152.303	-2.2556	100.253	0.363094
2141.2	455.306	-2.2632	152.944	-2.25405	100.131	0.362484
2142.4	454.802	-2.2632	153.401	-2.25289	100.284	0.361568
2143.6	454.619	-2.26389	153.905	-2.25229	100.253	0.362178
2144.9	454.115	-2.26492	154.179	-2.25057	99.9481	0.361873
2146.1	453.795	-2.26561	154.363	-2.2493	100.009	0.361873
2147.3	453.749	-2.26665	154.591	-2.2477	99.826	0.362178
2148.5	453.291	-2.2663	154.912	-2.24706	99.8565	0.361263
2149.7	453.154	-2.26768	154.912	-2.24611	99.6124	0.360652
2151	453.063	-2.26906	155.507	-2.24579	99.3988	0.361263
2152.2	452.88	-2.2694	155.461	-2.24483	99.3683	0.360958
2153.4	452.742	-2.27113	155.599	-2.24419	99.1546	0.358821
2154.6	452.467	-2.27078	155.69	-2.24355	98.9105	0.359432
2155.8	452.925	-2.27078	155.873	-2.24228	98.88	0.357295
2157	452.605	-2.27113	155.965	-2.24196	98.5137	0.358211
2158.3	452.834	-2.27113	156.285	-2.24196	98.7274	0.359127
2159.5	452.559	-2.27147	156.148	-2.24068	98.6663	0.358211
2160.7	452.696	-2.27147	156.285	-2.24004	98.6358	0.357906
2161.9	452.788	-2.27078	156.468	-2.241	98.7579	0.359432
2163.1	452.925	-2.27182	156.423	-2.24004	98.7579	0.357906
2164.4	452.971	-2.27147	156.423	-2.23877	98.6358	0.358211
2165.6	453.154	-2.27182	156.423	-2.23909	98.6968	0.357906
2166.8	453.154	-2.27251	156.789	-2.2394	98.941	0.358516
2168	453.108	-2.27216	156.331	-2.23909	98.8495	0.358516
2169.3	453.154	-2.27423	156.423	-2.23845	98.941	0.357906
2170.5	453.108	-2.27251	156.606	-2.23781	98.9715	0.357906
2171.7	453.337	-2.27492	156.331	-2.23813	98.9715	0.358516
2172.9	453.154	-2.27388	156.148	-2.23877	98.9715	0.359432
2174.1	453.2	-2.27492	156.148	-2.23845	99.0631	0.358516
2175.4	453.108	-2.27457	156.011	-2.23781	99.1241	0.358516
2176.6	453.2	-2.27526	155.782	-2.2394	99.1546	0.358516
2177.8	452.88	-2.27457	155.782	-2.23845	99.1852	0.357906
2179	452.925	-2.27526	155.553	-2.23972	99.0631	0.359127
2180.2	453.017	-2.27561	155.599	-2.23781	99.1241	0.359432
2181.5	452.925	-2.27595	155.37	-2.23877	99.2462	0.359432
2182.7	452.742	-2.27561	155.141	-2.23845	99.3683	0.360347
2183.9	452.605	-2.27561	155.004	-2.2394	99.4598	0.360652
2185.1	452.788	-2.2763	154.637	-2.23972	99.3377	0.360347
2186.3	452.605	-2.27526	154.408	-2.23972	99.3377	0.360652
2187.5	452.651	-2.27561	154.408	-2.24004	99.4903	0.361568
2188.8	452.513	-2.27561	154.225	-2.23972	99.5209	0.360652
2190	452.742	-2.27561	154.134	-2.23972	99.4598	0.360347
2191.2	452.467	-2.2763	153.859	-2.24004	99.3988	0.360958
2192.4	452.284	-2.27664	153.722	-2.24036	99.5819	0.361568
2193.6	452.376	-2.27595	153.493	-2.24068	99.4598	0.360652
2194.9	452.376	-2.27526	153.401	-2.24068	99.4903	0.362178
2196.1	452.376	-2.27526	153.264	-2.24164	99.3683	0.361873
2197.3	452.147	-2.27595	153.035	-2.24164	99.5514	0.362178
2198.5	452.605	-2.27526	152.806	-2.24132	99.7345	0.363399
2199.7	452.33	-2.2763	152.623	-2.24196	99.9176	0.364315
2201	452.193	-2.27561	152.348	-2.24291	100.223	0.36523
2202.2	452.147	-2.27561	152.119	-2.24355	100.101	0.364009
2203.4	452.284	-2.2763	152.074	-2.24419	100.314	0.36462
2204.6	452.605	-2.27595	152.028	-2.24483	100.345	0.365841
2205.8	452.376	-2.2763	152.028	-2.24451	100.528	0.365535
2207	452.467	-2.27664	151.799	-2.24579	100.497	0.36462
2208.3	452.513	-2.2763	151.753	-2.24547	100.558	0.36462
2209.5	452.742	-2.27595	151.616	-2.24547	100.528	0.366146
2210.7	452.513	-2.27595	151.433	-2.24579	100.589	0.366756
2211.9	452.696	-2.2763	151.296	-2.24706	100.62	0.366451
2213.1	452.696	-2.27595	150.792	-2.24738	100.681	0.366146
2214.4	452.742	-2.27526	150.746	-2.24706	100.589	0.366756
2215.6	452.742	-2.27561	150.929	-2.24834	100.65	0.367366
2216.8	452.971	-2.27526	150.655	-2.24802	100.742	0.367061
2218	452.742	-2.2763	150.792	-2.24802	100.711	0.367672
2219.2	452.696	-2.27526	150.38	-2.24898	100.711	0.368282
2220.5	452.651	-2.27492	150.334	-2.24994	100.68	0.368587
2221.7	452.651	-2.27595	150.288	-2.24962	100.803	0.367672
2222.9	452.788	-2.27526	150.151	-2.25026	100.681	0.368282
2224.1	452.88	-2.27595	150.06	-2.2499	100.62	0.368893
2225.3	452.834	-2.27492	149.922	-2.25026	100.833	0.368282
2226.5	452.788	-2.27561	150.014	-2.25173	100.65	0.368893
2227.8	452.834	-2.27492	149.876	-2.25089	100.864	0.368587
2229	452.834	-2.27595	149.648	-2.25085	100.925	0.368893
2230.2	453.154	-2.27561	149.785	-2.25117	100.925	0.369198
2231.4	453.017	-2.27561	149.739	-2.25113	101.016	0.368892
2232.6	453.063	-2.27561	149.556	-2.25201	101.077	0.369808
2233.9	452.788	-2.27492	149.373	-2.25229	101.23	0.369198
2235.1	452.971	-2.27526	149.419	-2.25317	101.016	0.369808
2236.3	452.834	-2.27526	149.144	-2.25201	101.108	0.368893
2237.5	452.88	-2.27526	149.007	-2.25313	101.077	0.369503
2238.7	452.422	-2.27526	149.007	-2.25313	100.986	0.368893
2240	452.834	-2.27457	148.778	-2.25436	100.62	0.369808
2241.2	452.605	-2.27492	148.732	-2.25345	100.375	0.369503
2242.4	452.696	-2.27561	148.778	-2.25401	99.8871	0.369503
2243.8	452.33	-2.27457	148.549	-2.25496	99.7345	0.368587
2245	452.559	-2.27388	148.503	-2.25433	99.4293	0.368282
2246.3	452.513	-2.27457	148.091	-2.25496	99.3072	0.369198
2247.5	452.559	-2.27423	148	-2.2556	99.1546	0.367061
2248.7	452.239	-2.27457	147.404	-2.2556	98.9715	0.368587
2249.9	452.01	-2.27526	146.672	-2.25752	98.8189	0.367367
2251.1	451.46	-2.27388	145.115	-2.25943	98.6969	0.367977
2252.4	451.002	-2.27492	143.284	-2.26199	98.3611	0.368587
2253.6	450.499	-2.27423	140.95	-2.26581	97.9949	0.368587
2254.8	450.316	-2.27457	138.752	-2.26901	98.117	0.371029
2256	450.453	-2.27457	136.097	-2.27451	97.9644	0.371944
2257.2	450.819	-2.27285	133.579	-2.27882	97.9339	0.374081
2258.5	451.002	-2.27182	131.428	-2.28457	98.0254	0.376217
2259.7	451.094	-2.27009	128.819	-2.28967	98.2696	0.379574
2260.9	451.323	-2.26768	125.98	-2.29693	98.2391	0.380184
2262.1	451.186	-2.26596	123.005	-2.30396	98.117	0.382015
2263.3	451.231	-2.26286	120.35	-2.31229	98.117	0.385067
2264.5	451.094	-2.25976	117.603	-2.31951	98.2391	0.386593
2265.8	450.911	-2.25631	114.856	-2.32877	98.3306	0.38934
2267	450.728	-2.25287	112.156	-2.33699	98.4222	0.391781
2268.2	450.453	-2.24977	109.409	-2.34716	98.4832	0.393307
2269.4	450.591	-2.24563	107.303	-2.35446	98.7579	0.395444
2270.6	450.636	-2.24115	105.38	-2.36404	98.8495	0.39758
2271.9	450.682	-2.23771	103.137	-2.37289	99.1241	0.399106
2273.1	450.774	-2.23357	101.26	-2.38055	99.2157	0.401853
2274.3	451.231	-2.22944	99.5666	-2.38845	99.4293	0.403073
2275.5	451.369	-2.22461	97.7813	-2.39484	99.704	0.403684
2276.7	451.506	-2.22082	96.2249	-2.40409	99.765	0.405515
2278	451.918	-2.21703	94.8973	-2.41072	99.9481	0.407346
2279.2	452.239	-2.21393	93.4782	-2.4171	100.192	0.407956
2280.4	452.788	-2.20911	92.7915	-2.42252	100.345	0.409177
2281.6	453.429	-2.20359	91.7386	-2.42851	100.528	0.409482
2282.8	454.07	-2.19981	90.7315	-2.43457	100.711	0.410703
2284	454.619	-2.19567	90.1364	-2.44032	100.864	0.411923
2285.3	455.306	-2.19154	89.816	-2.4447	101.047	0.411618
2286.5	455.763	-2.18775	89.4497	-2.44886	101.138	0.411313
2287.7	456.496	-2.18499	88.8089	-2.45205	101.474	0.411924
2288.9	456.862	-2.1812	88.4426	-2.4562	101.566	0.411618
2290.1	456.816	-2.17844	88.1222	-2.45875	101.566	0.411313
2291.4	456.862	-2.17569	87.9391	-2.46258	101.566	0.412534
2292.6	457.137	-2.17431	87.8475	-2.46378	101.474	0.411008
2293.8	457.457	-2.1719	87.8018	-2.46441	101.535	0.411313
2324.8	457.091	-2.17121	106.525	-2.42536	99.9786	0.387509
2326.1	456.954	-2.1719	106.708	-2.42564	100.497	0.386898
2327.3	456.816	-2.17396	107.12	-2.42424	100.62	0.385983
2328.5	456.587	-2.17431	107.44	-2.42312	100.955	0.386593
2329.7	456.221	-2.17534	107.532	-2.4222	101.077	0.386898
2330.9	456.13	-2.17638	107.761	-2.42029	101.047	0.386898
2332.2	455.855	-2.17672	108.127	-2.41965	101.169	0.386898
2333.4	455.534	-2.17948	108.173	-2.41901	101.352	0.387814
2334.6	455.306	-2.18017	108.219	-2.41774	101.444	0.387509
2335.8	455.306	-2.18085	108.448	-2.41742	101.749	0.388119
2337	454.711	-2.18154	108.402	-2.41646	101.81	0.388424
2338.3	454.527	-2.18189	108.539	-2.41646	101.84	0.390255
2339.5	454.253	-2.18292	108.356	-2.41646	101.81	0.390255
2340.7	453.932	-2.18327	108.356	-2.41646	101.81	0.391171
2341.9	453.612	-2.18361	108.127	-2.41582	101.962	0.389645
2343.1	453.337	-2.18465	108.173	-2.41678	101.84	0.390866
2344.3	453.337	-2.18499	108.173	-2.41678	101.993	0.392087
2345.6	453.017	-2.18602	107.715	-2.41774	101.901	0.393002
2346.8	452.788	-2.18602	107.944	-2.41678	102.145	0.392697
2348	452.696	-2.18671	107.578	-2.41678	101.993	0.393307
2349.2	452.696	-2.18602	107.44	-2.41774	102.023	0.393612
2350.4	452.925	-2.18706	107.395	-2.41806	102.023	0.393612
2351.7	452.422	-2.18671	107.303	-2.41869	102.145	0.393612
2352.9	452.467	-2.1874	106.845	-2.41933	102.023	0.394833
2354.1	452.742	-2.1874	106.616	-2.41965	102.084	0.395138
2355.3	452.834	-2.1874	106.388	-2.41965	102.176	0.397885
2356.5	452.88	-2.1874	106.204	-2.42061	102.145	0.396969
2357.8	452.925	-2.18775	106.021	-2.42189	102.145	0.396969
2359	453.108	-2.18809	105.655	-2.42189	102.145	0.397275
2360.2	453.383	-2.18809	105.655	-2.42284	102.329	0.397275
2361.4	453.429	-2.18809	105.243	-2.42252	102.267	0.39758
2362.6	453.474	-2.18809	105.014	-2.42396	102.145	0.400021
2363.8	453.795	-2.18775	104.74	-2.42396	102.267	0.399411
2365.1	453.795	-2.18844	104.282	-2.42508	102.176	0.400632
2366.3	454.07	-2.18706	104.099	-2.42627	101.993	0.400937
2367.5	454.024	-2.18775	103.824	-2.42691	101.962	0.400021
2368.7	453.795	-2.1874	103.366	-2.42787	101.81	0.401547
2369.9	454.161	-2.18706	103.137	-2.42851	101.718	0.401547
2371.2	454.024	-2.18775	102.954	-2.42947	101.901	0.401547
2372.4	454.207	-2.1874	102.908	-2.42947	101.932	0.400021
2373.6	454.253	-2.18775	102.68	-2.43042	101.932	0.402463
2374.8	454.39	-2.18775	102.588	-2.43074	101.962	0.401547
2376	454.39	-2.18671	102.084	-2.43202	101.993	0.402158
2377.3	454.665	-2.18809	101.856	-2.43202	101.932	0.401547
2378.5	454.711	-2.18706	101.718	-2.43362	102.023	0.403378
2379.7	454.94	-2.18568	101.718	-2.43234	102.054	0.402463
2380.9	455.351	-2.18671	101.444	-2.43362	101.993	0.402158
2382.1	455.489	-2.18602	101.352	-2.43361	101.962	0.402463
2383.4	455.534	-2.18464	101.215	-2.43425	102.115	0.402158
2384.6	455.718	-2.18499	101.123	-2.43553	101.84	0.403073
2385.8	455.947	-2.18396	101.123	-2.43553	101.901	0.403378
2387	456.038	-2.18327	100.803	-2.43617	101.901	0.402463
2388.2	456.358	-2.18258	100.803	-2.43649	101.932	0.404294
2389.5	456.496	-2.18258	100.848	-2.43649	101.993	0.403073
2390.7	456.908	-2.18189	100.848	-2.43681	101.932	0.402463
2391.9	457.045	-2.18189	100.757	-2.43776	101.962	0.403378
2393.1	456.999	-2.18189	100.62	-2.43776	101.779	0.402463
2394.3	456.908	-2.18223	100.482	-2.4384	101.871	0.401853
2395.5	456.908	-2.18189	100.07	-2.43936	101.81	0.403073
2396.8	456.862	-2.18154	100.162	-2.43872	101.688	0.403073
2398	456.999	-2.1812	99.9329	-2.4384	101.718	0.403378
2399.2	456.908	-2.18154	99.8413	-2.43936	101.718	0.403684
2400.4	457.045	-2.18051	99.7497	-2.44032	101.81	0.403073
2401.6	457.091	-2.18051	99.704	-2.44032	101.749	0.403378
2402.9	457.274	-2.18017	99.6582	-2.44096	101.688	0.404294
2404.1	457.274	-2.17913	99.5208	-2.44159	101.688	0.402768
2405.3	457.503	-2.17913	99.6582	-2.44159	101.718	0.402158
2406.5	457.366	-2.17913	99.3835	-2.44123	101.81	0.403989
2407.7	457.549	-2.17913	99.292	-2.44064	101.871	0.402463
2409	457.686	-2.17948	99.3377	-2.44187	101.932	0.402158
2410.2	457.457	-2.17844	99.2004	-2.44271	101.901	0.404599
2413.4	457.411	-2.17775	98.9715	-2.44299	101.993	0.404599
2414.6	457.64	-2.17844	99.0631	-2.44355	102.115	0.403378
2415.8	457.686	-2.1781	99.0173	-2.44327	102.908	0.406125
2417	458.052	-2.17879	99.2004	-2.44243	104.587	0.408872
2418.3	458.464	-2.17775	99.3835	-2.44271	107.12	0.414975
2419.5	459.059	-2.17741	99.6582	-2.44299	110.263	0.420164
2420.7	459.609	-2.17844	100.162	-2.44383	112.98	0.426878
2421.9	459.471	-2.17879	100.299	-2.44355	116.062	0.433897
2423.1	460.295	-2.18051	100.94	-2.44507	119.51	0.443358
2424.4	460.341	-2.1812	101.123	-2.44694	122.562	0.450987
2425.6	460.616	-2.18258	101.26	-2.4479	125.767	0.459838
2426.8	460.387	-2.18396	101.627	-2.44981	128.33	0.468078
2428	459.975	-2.18465	101.535	-2.45268	130.222	0.473571
2429.2	459.288	-2.18602	101.444	-2.45428	131.443	0.47937
2430.5	459.105	-2.18809	101.81	-2.45556	132.847	0.484863
2431.7	458.51	-2.18809	101.764	-2.45811	134.922	0.489746
2432.9	458.144	-2.18981	101.901	-2.45907	137.211	0.495239
2434.1	458.235	-2.19223	102.13	-2.46002	140.263	0.504089
2435.3	457.869	-2.19429	102.267	-2.45939	142.552	0.510193
2436.5	457.594	-2.19636	102.222	-2.46002	144.566	0.515076
2437.8	457.32	-2.19912	102.359	-2.46034	147.221	0.519959
2439	457.228	-2.20015	102.588	-2.45999	149.815	0.527284
2440.2	456.816	-2.20187	102.451	-2.4609	151.524	0.531251
2441.4	456.542	-2.20325	102.313	-2.46062	152.562	0.536134
2442.6	456.175	-2.20359	102.13	-2.46202	153.203	0.53766
2443.9	455.763	-2.20463	101.993	-2.46318	153.813	0.542238
2445.1	455.626	-2.20601	102.405	-2.46378	153.996	0.542848
2446.3	455.077	-2.20532	101.672	-2.46601	153.813	0.544679
2447.5	454.985	-2.20566	101.901	-2.46697	153.63	0.544984
2448.7	454.985	-2.20635	101.581	-2.46888	153.142	0.544679
2450	454.802	-2.20635	101.535	-2.46888	152.287	0.545595
2451.2	454.482	-2.20566	101.535	-2.46952	151.494	0.546815
2452.4	454.07	-2.20532	101.169	-2.4692	150.822	0.543458
2453.6	454.207	-2.20601	101.077	-2.46888	150.182	0.543153
2454.8	454.024	-2.20532	100.665	-2.46984	149.632	0.541627
2456	453.749	-2.20463	100.574	-2.4692	149.205	0.540407
2457.3	454.115	-2.20532	100.299	-2.46824	148.93	0.539186
2458.5	453.658	-2.20532	100.116	-2.46824	148.93	0.539491
2459.7	454.07	-2.20566	100.162	-2.46824	149.449	0.540407
2460.9	453.887	-2.20566	99.8871	-2.46792	149.571	0.540101
2462.1	453.887	-2.20635	99.3835	-2.46792	149.724	0.539796
2463.4	454.115	-2.20635	99.3835	-2.46824	150.12	0.539796
2464.6	454.299	-2.20566	99.2462	-2.4676	150.578	0.539796
2616.1	457.961	-2.18499	94.5311	-2.50606	151.982	0.550172
2617.4	457.732	-2.18533	94.5768	-2.5067	152.043	0.550172
2618.6	457.732	-2.18396	94.6226	-2.50575	151.86	0.549562
2619.8	457.732	-2.18533	94.76	-2.50575	151.982	0.550172
2621	457.64	-2.18499	94.5768	-2.50638	151.799	0.549867
2622.3	457.457	-2.18499	94.5311	-2.50606	151.708	0.549867
2623.5	457.503	-2.18464	94.4853	-2.5067	151.524	0.549562
2624.7	457.503	-2.18499	94.7142	-2.5067	151.769	0.549867
2625.9	457.32	-2.18499	94.76	-2.50606	151.677	0.549867
2627.3	457.183	-2.18465	94.6226	-2.50543	151.647	0.550172
2628.6	457.137	-2.1843	94.5311	-2.50575	151.921	0.549867
2629.8	457.228	-2.18499	94.9889	-2.50606	152.928	0.552003
2631	457.411	-2.18533	94.9431	-2.50479	154.729	0.555055
2632.2	457.915	-2.18568	95.4924	-2.50479	157.17	0.559328
2633.4	458.235	-2.18568	95.8586	-2.50511	159.734	0.56299
2634.7	458.876	-2.1874	96.3622	-2.50483	162.419	0.568789
2635.9	459.334	-2.18844	96.9573	-2.50511	165.563	0.575198
2637.1	459.563	-2.18947	97.3693	-2.50419	168.676	0.580691
2638.3	459.792	-2.19085	98.2849	-2.50606	171.88	0.588321
2639.5	459.838	-2.19188	98.6968	-2.50638	174.78	0.594424
2640.8	460.021	-2.1936	98.9715	-2.50734	177.587	0.602969
2642	459.334	-2.19602	99.292	-2.50766	180.151	0.607547
2643.2	459.243	-2.1967	99.6582	-2.50894	182.592	0.613346
2644.4	459.151	-2.19912	100.07	-2.50926	184.82	0.620365
2645.6	458.876	-2.20084	100.665	-2.51085	187.201	0.626469
2646.8	458.373	-2.20256	100.757	-2.51085	189.306	0.632877
2648.1	458.098	-2.20394	101.306	-2.51341	191.443	0.638981
2649.3	457.915	-2.20601	101.581	-2.51309	193.335	0.643864
2650.5	457.686	-2.20807	101.901	-2.51468	195.563	0.649052
2651.7	457.457	-2.2098	102.313	-2.515	197.638	0.653325
2652.9	457.228	-2.21083	102.222	-2.51532	199.072	0.658818
2654.2	456.679	-2.2129	102.451	-2.51628	200.537	0.660955
2655.4	456.221	-2.21531	102.451	-2.5166	201.483	0.665838
2656.6	455.626	-2.21634	102.588	-2.51756	202.002	0.667669
2657.8	454.894	-2.21703	102.267	-2.51756	202.49	0.67011
2659	454.024	-2.21841	102.176	-2.51915	202.551	0.671941
2660.3	453.429	-2.22013	102.039	-2.51915	202.49	0.673162
2661.5	452.925	-2.22013	101.672	-2.51975	202.46	0.674078
2662.7	452.284	-2.22048	101.718	-2.52119	202.124	0.674993
2663.9	452.147	-2.22186	101.718	-2.52174	201.788	0.674993
2665.1	451.918	-2.22117	101.398	-2.52119	201.453	0.675298
2666.3	451.552	-2.22151	101.398	-2.52202	200.934	0.674993
2667.6	451.277	-2.2222	101.169	-2.52234	200.629	0.674688
2668.8	451.323	-2.22255	101.169	-2.5223	200.446	0.674688
2670	450.819	-2.22255	101.215	-2.52258	200.14	0.675604
2671.2	450.957	-2.22186	101.123	-2.52322	199.988	0.674688
2672.4	451.094	-2.22186	101.077	-2.5229	199.835	0.675604
2673.7	451.323	-2.22255	101.031	-2.52262	199.774	0.673162
2674.9	451.415	-2.22255	100.848	-2.52358	199.377	0.674078
2676.1	451.323	-2.22289	100.94	-2.52386	199.194	0.673772
2677.3	451.735	-2.2222	100.94	-2.52354	198.889	0.672857
2678.5	451.872	-2.22186	100.848	-2.52354	199.103	0.672857
2679.8	452.055	-2.22186	100.848	-2.52386	199.042	0.672552
2681	452.376	-2.22117	100.848	-2.52418	199.103	0.673467
2682.2	452.376	-2.22255	100.94	-2.52358	199.011	0.672552
2683.4	452.651	-2.22186	100.757	-2.52354	199.072	0.672857
[truncated: 4,508 more rows]
